# Supplementary material for: The FNIP co-chaperones decelerate the Hsp90 chaperone cycle and enhance drug binding
Source: PubMed Central journal article supplement (PMC4931344; doi:10.1038/ncomms12037), 2016-06-29
Supplement: ncomms12037-s1.pdf [file ncomms12037-s1.pdf]

# Supplementary Fig. 1

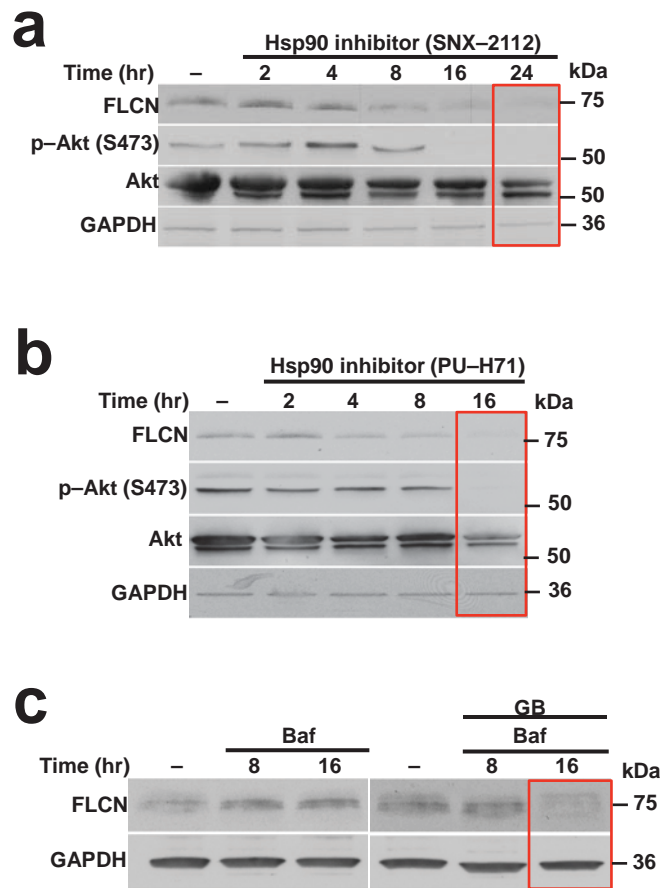

**Supplementary Fig. 1. FLCN is a new client of Hsp90. Related to Fig. 1.**

- HEK293 cells were treated with 2 $\mu$ M of the Hsp90 inhibitor SNX-2112 for the indicated times. FLCN protein was detected by immunoblotting.
- HEK293 cells were treated with 3 $\mu$ M of the Hsp90 inhibitor PU-H71 for the indicated times. FLCN was detected by immunoblotting.
- 100nM treatment of HEK293 cells with the lysosome inhibitor bafilomycin (Baf) for 8 or 16 hr in presence or absence of 1 $\mu$ M ganetespib (GB).

# Supplementary Fig. 2

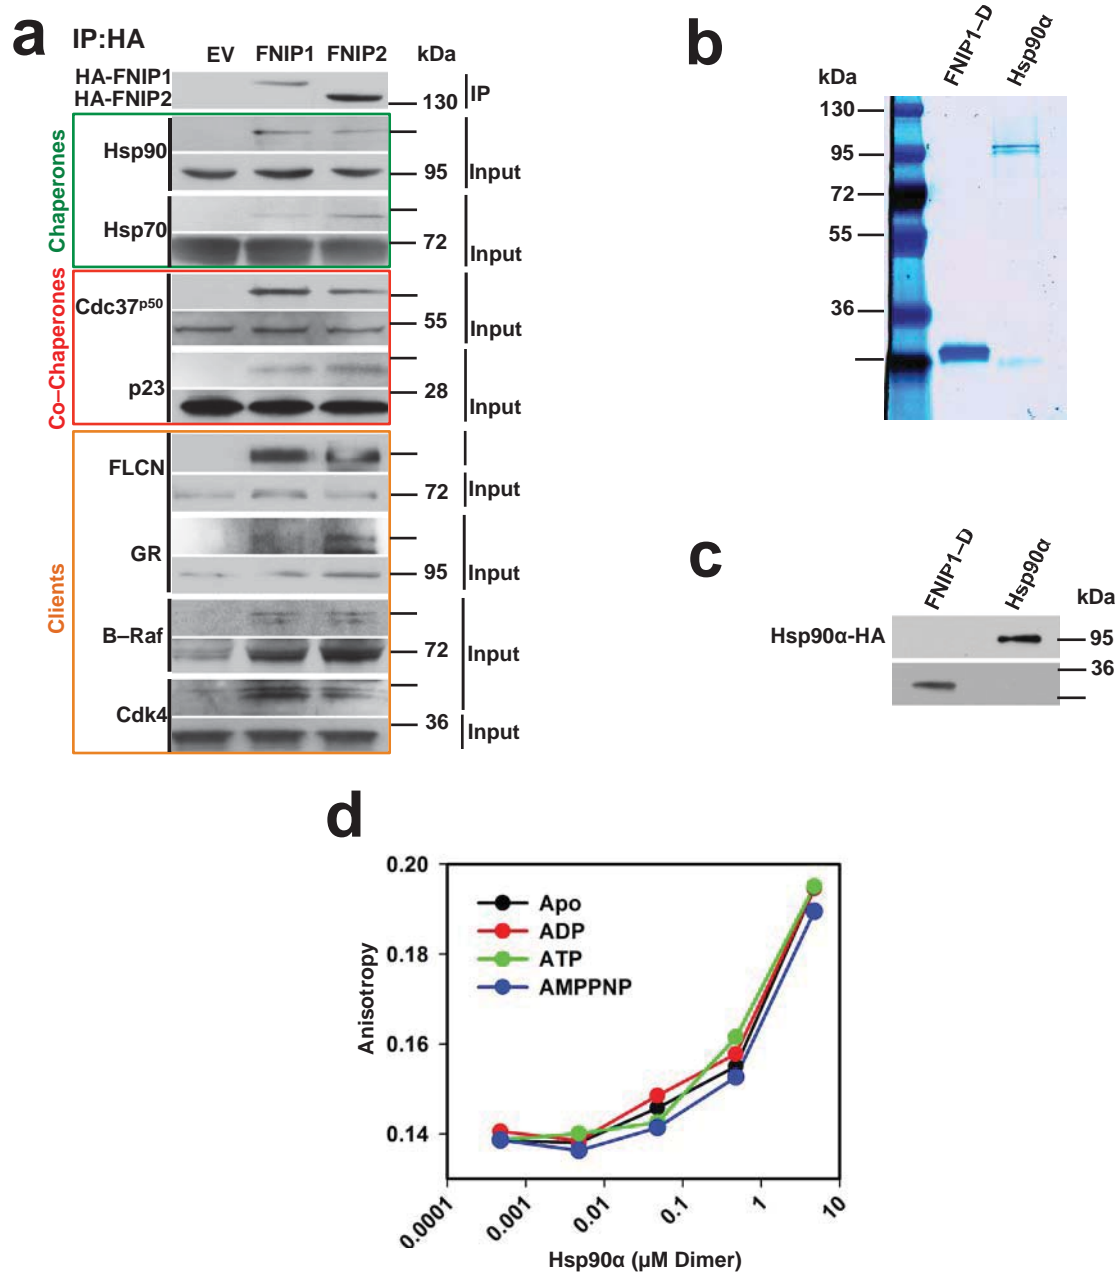

Supplementary Fig. 2. FNIP1 facilitates FLCN binding to the Hsp90 chaperone. Related to Fig. 2-3.

- Empty vector (EV), HA-FNIP1 or HA-FNIP2 constructs transiently expressed and isolated from HEK293 cells. Interaction of FNIP1 and FNIP2 with the molecular chaperones, co-chaperones and indicated client proteins were assessed by immunoblotting.
- 100ng of the purified FNIP1-D-His<sub>6</sub> and 50ng Hsp90α-HA protein samples were resolved on the SDS-PAGE gel and stained with Coomassie stain.
- Western blot analysis of the purified proteins from (A).
- FNIP1-D-His<sub>6</sub>:HSP90α-HA binding measured by fluorescence anisotropy in the presence and absence of different adenosine nucleotides.

# Supplementary Fig. 3

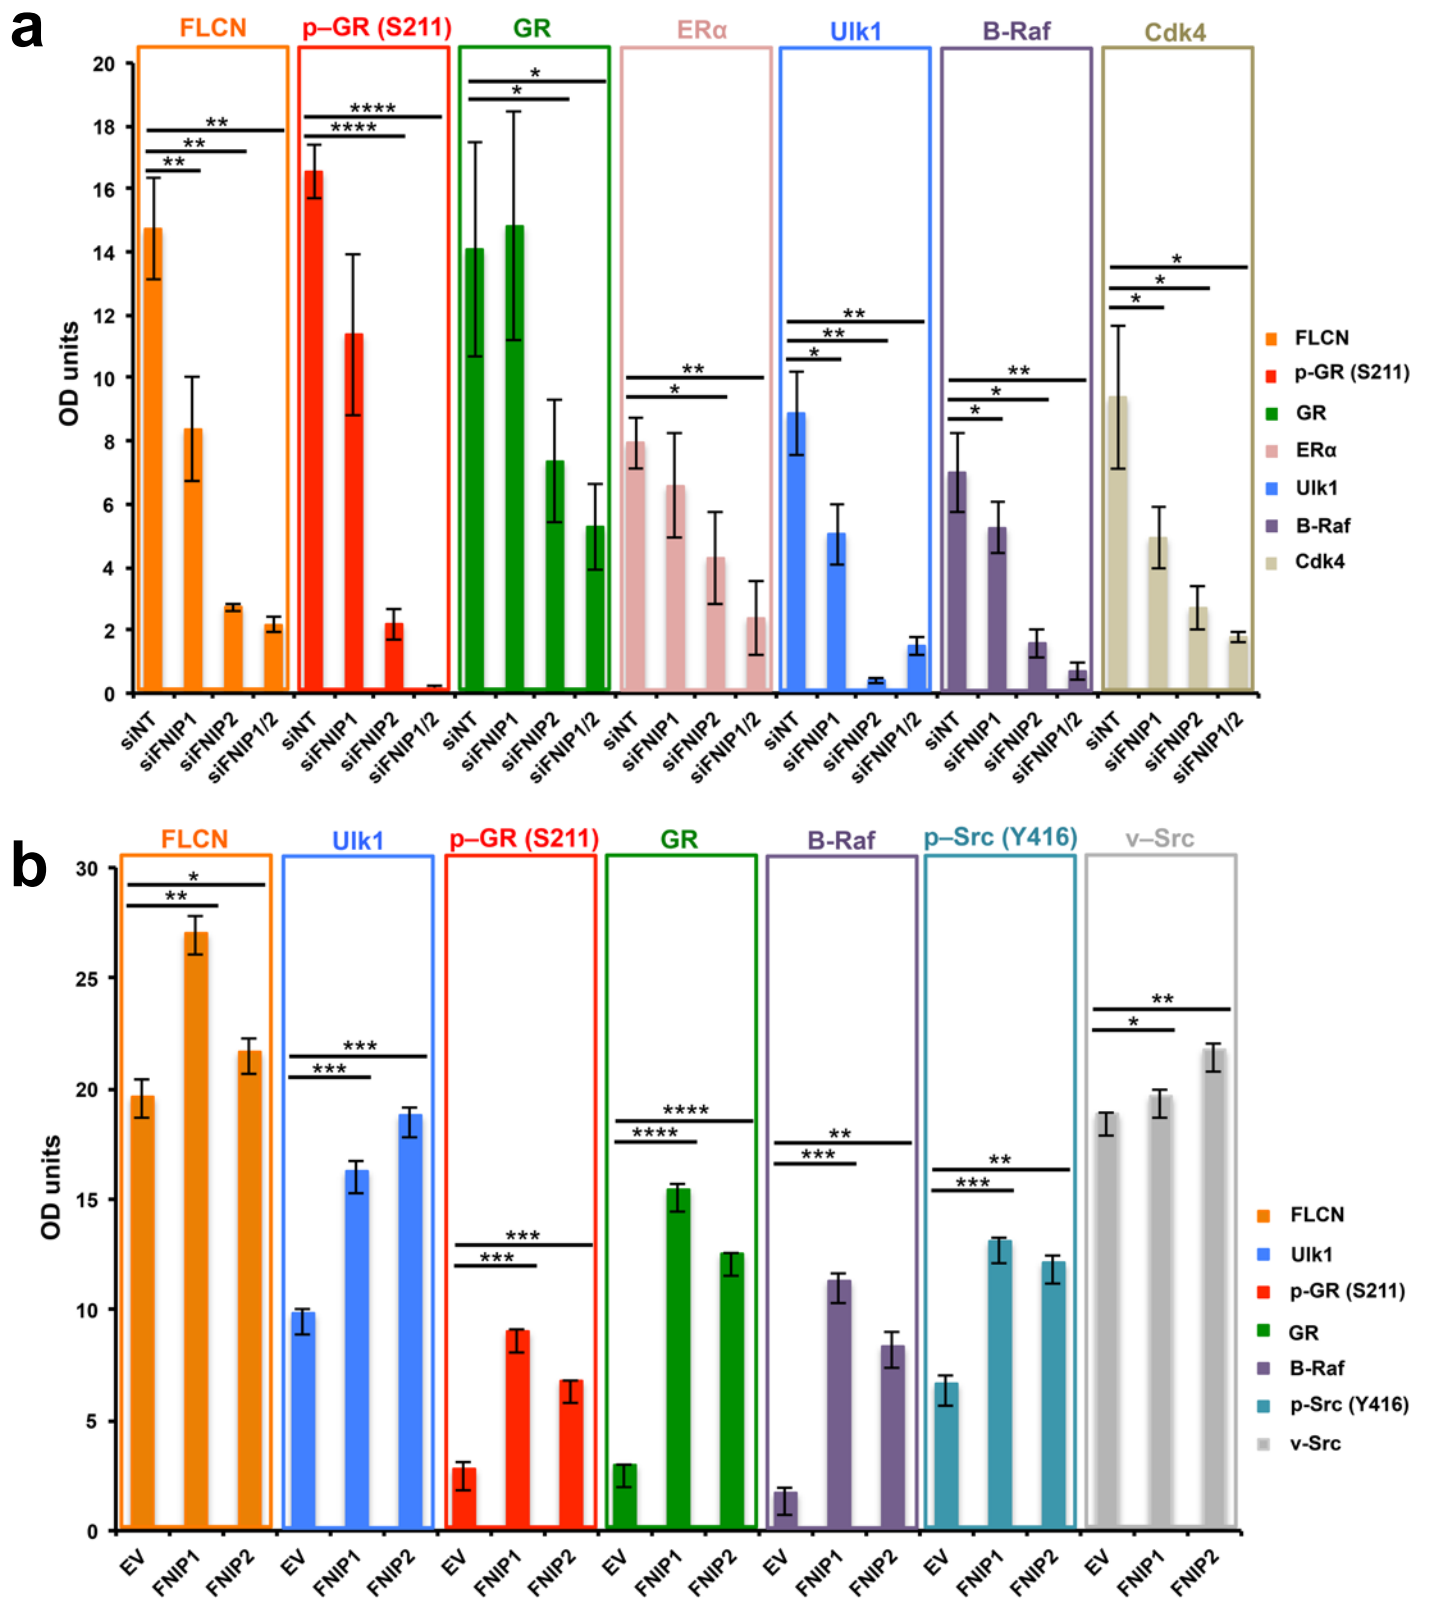

**Supplementary Fig. 3 . FNIP co-chaperones facilitate chaperoning of the clients. Related to Fig. 4.**

- a) Effect of siRNA knockdown of *FNIP1* and *FNIP2* on Hsp90 clients. Stability and activity of the indicated Hsp90 clients were assessed by immunoblotting. Densitometry (optical density, OD) of the Western blot in Fig. 3a are represented as mean  $\pm$  S.D. (\* $p < 0.05$ , \*\* $p < 0.005$ , \*\*\*\* $p < 0.00001$ ).
- b) Transient overexpression of cMyc-tagged *FNIP1* or *FNIP2* in HEK293 cells and their impact on levels of Hsp90 clients was assessed by immunoblotting in Fig. 3b. Densitometry (OD) of the Western blot in Fig. 3a are represented as mean  $\pm$  S.D. (\* $p < 0.05$ , \*\* $p < 0.005$ , \*\*\*\* $p < 0.00005$ , \*\*\*\*\* $p < 0.00001$ ).

# Supplementary Fig. 4

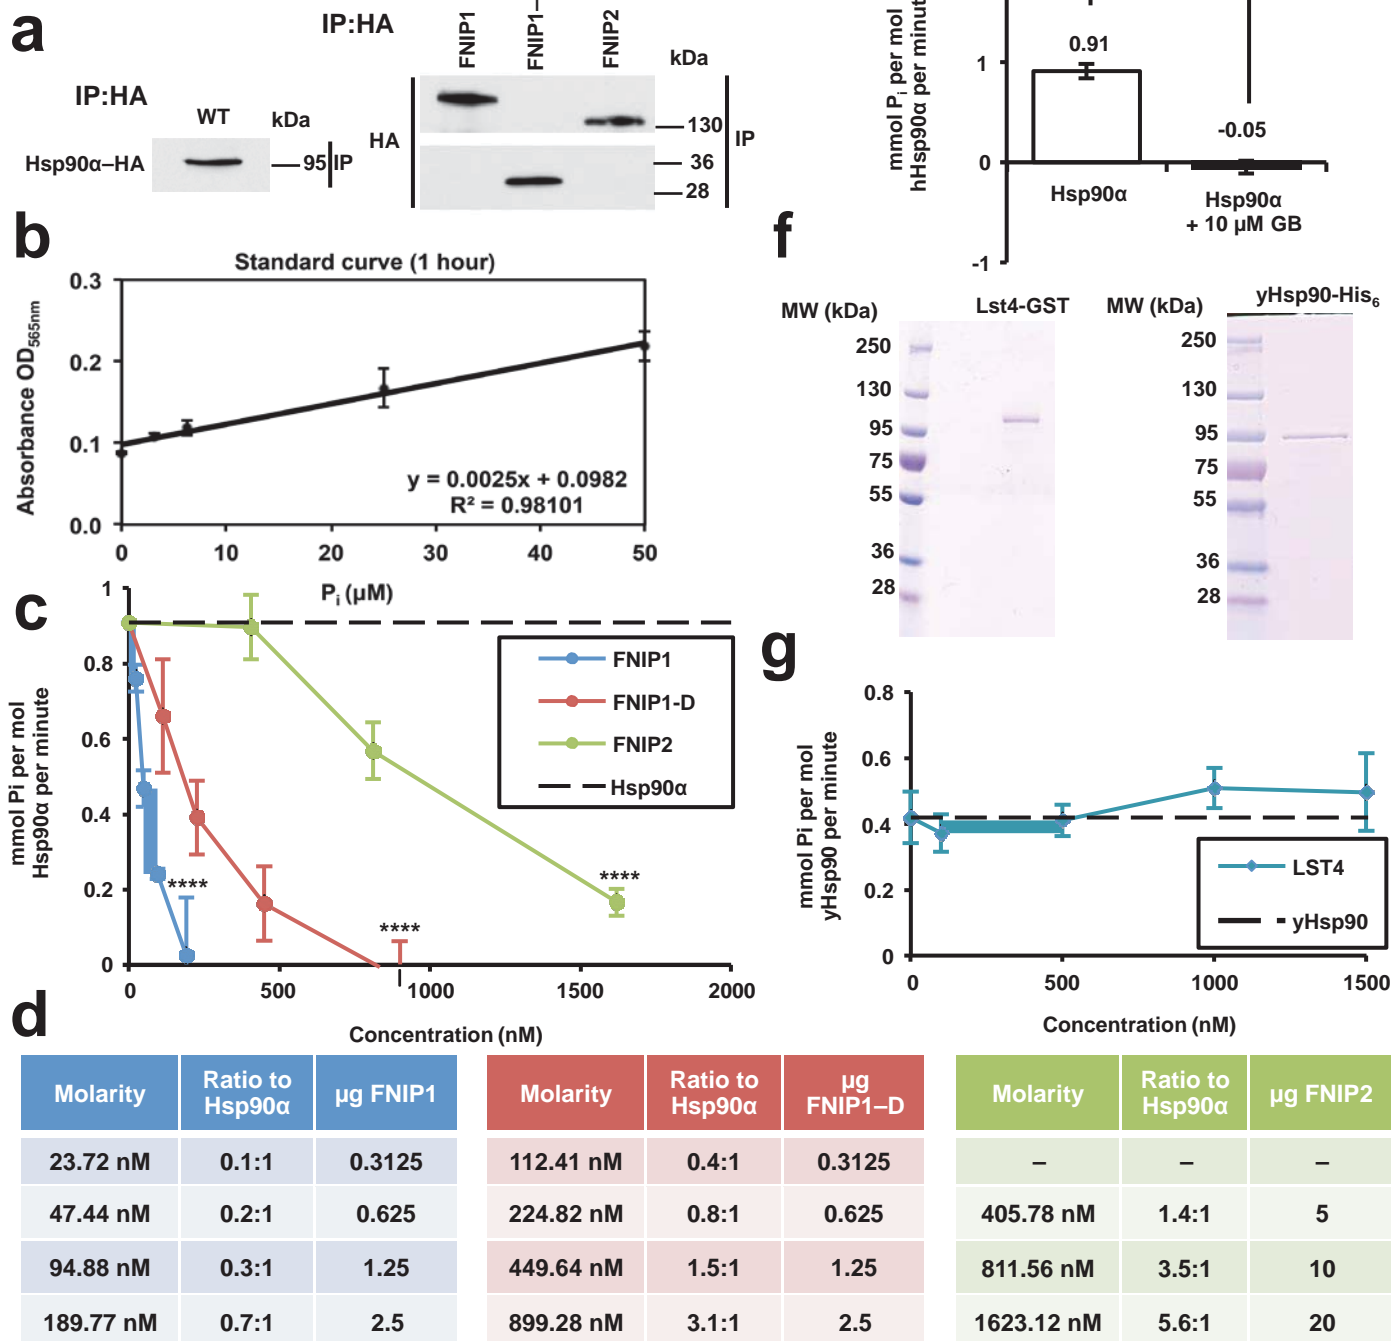

**Supplementary Fig. 4. FNIP co-chaperones inhibit Hsp90 chaperone cycle and facilitate chaperoning of the clients. Related to Fig. 4-5.**

- PC3 cells were transiently transfected with Hsp90α-HA and HEK293 cells were transiently transfected with HA-FNIP1, HA-FNIP1-D, or HA-FNIP2 constructs. Hsp90α-HA, HA-FNIP1, HA-FNIP1-D, and HA-FNIP2 were immunoprecipitated, competed with the relevant peptides and proteins were detected by immunoblotting.
- Inorganic phosphate ( $P_i$ ) standard curve at 1 hr. The x-axis shows  $\mu\text{M}$  of  $P_i$  per assay and the y-axis shows absorbance at 565nm. Mean  $\pm$  S.D. from values obtained in three independent experiments.
- ATPase activity of Hsp90α-HA with or without HA-FNIP1, HA-FNIP1-D, or HA-FNIP2 expressed in mmol  $P_i$  per mol Hsp90α per minute. Mean  $\pm$  S.D. from values obtained in three independent experiments with  $***p < 0.0005$ .
- Molarity of the proteins in the ATPase assay, ratio to Hsp90, and total quantity of protein added.
- ATPase activity of Hsp90α-HA with or without 10 $\mu\text{M}$  GB expressed in mmol  $P_i$  per mol Hsp90α per minute. Mean  $\pm$  S.D. from values obtained in three independent experiments with  $****p < 0.0001$ .
- 50ng of Lst4-GST and yHsp90-His6 were resolved on the SDS-PAGE gel and stained with Coomassie stain.
- In vitro* ATPase activity of the yHsp90-His<sub>6</sub> with indicated amounts Lst4-GST. All the data represent mean  $\pm$  S.D.

# Supplementary Fig. 5

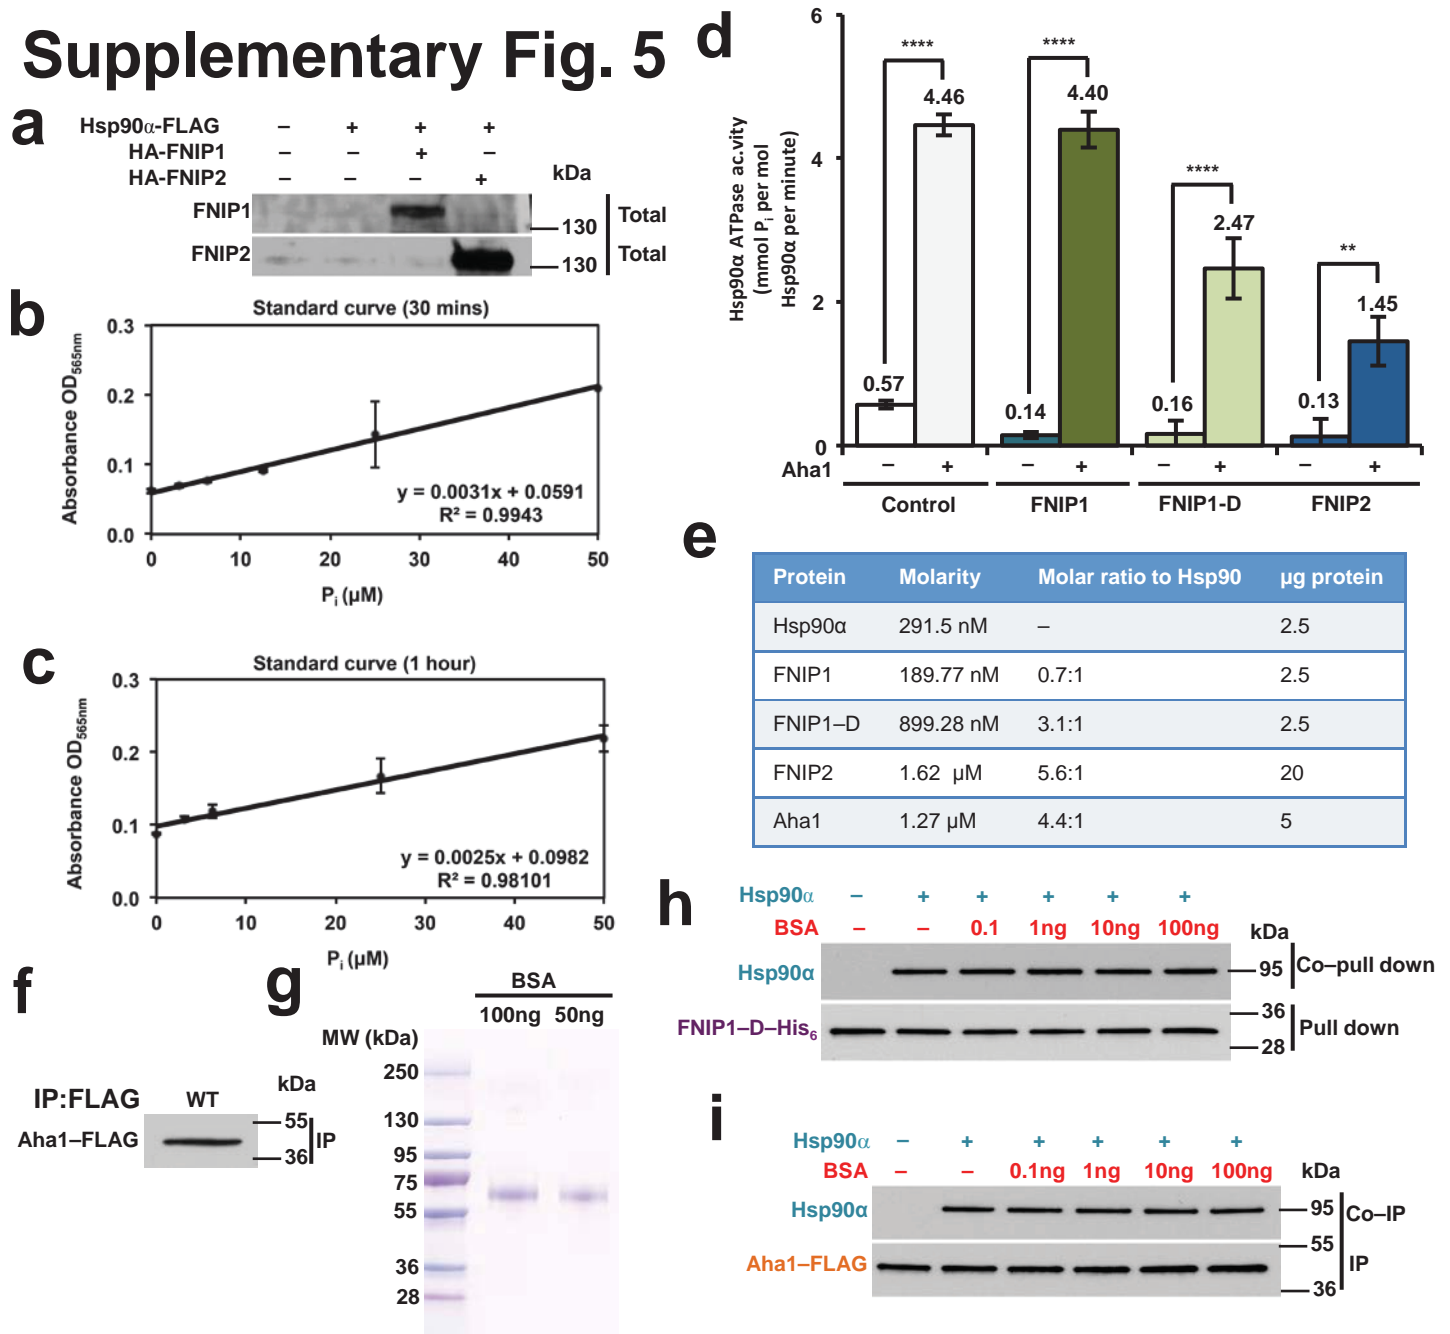

**Supplementary Fig. 5. FNIPs compete with the Aha1 co-chaperone for binding to Hsp90. Related to Fig. 6.**

- Hsp90 $\alpha$  with and without HA-FNIP1 and HA-FNIP2 proteins from Figure 4B. Western blotting validates overexpression of FNIPs compared to endogenous levels of FNIP1 and FNIP2.
- Inorganic phosphate (Pi) standard curve at 30 min and
- 1 hour. The x-axis shows  $\mu$ M of Pi per assay and the y-axis shows absorbance at 565nm. Mean  $\pm$  S.D. from values obtained in three independent experiments.
- Inhibition of Hsp90 $\alpha$ -HA ATPase activity 30 min after the addition of HA-FNIP1 or HA-FNIP2 and subsequent stimulation by Aha1-FLAG after an additional 30 min expressed in mmol Pi per mol Hsp90 $\alpha$  per min. Mean  $\pm$  S.D. from three independent experiments with \*\*p < 0.005, \*\*\*\*p < 0.0001.
- Molarity of the protein in the ATPase assay, ratio to Hsp90, and total quantity of protein added are listed.
- HEK293 cells were transiently transfected with Aha1-FLAG. Following immunoprecipitation, protein was competed with peptide and detected by immunoblotting with anti-FLAG antibody.
- Indicated amounts of BSA were resolved on the SDS-PAGE gel and stained with Coomassie stain.
- FNIP1-D-His<sub>6</sub> was attached to Ni-NTA agarose and then incubated with Hsp90 $\alpha$ . Ni-NTA agarose was then washed and incubated with the indicated amounts of BSA.
- Aha1-FLAG attached to anti-FLAG M2 affinity gel was incubated with Hsp90 $\alpha$  initially and then washed and incubated with indicated amounts of BSA.

# Supplementary Fig. 6. Full original immunoblots and gel images.

## Figure 1b

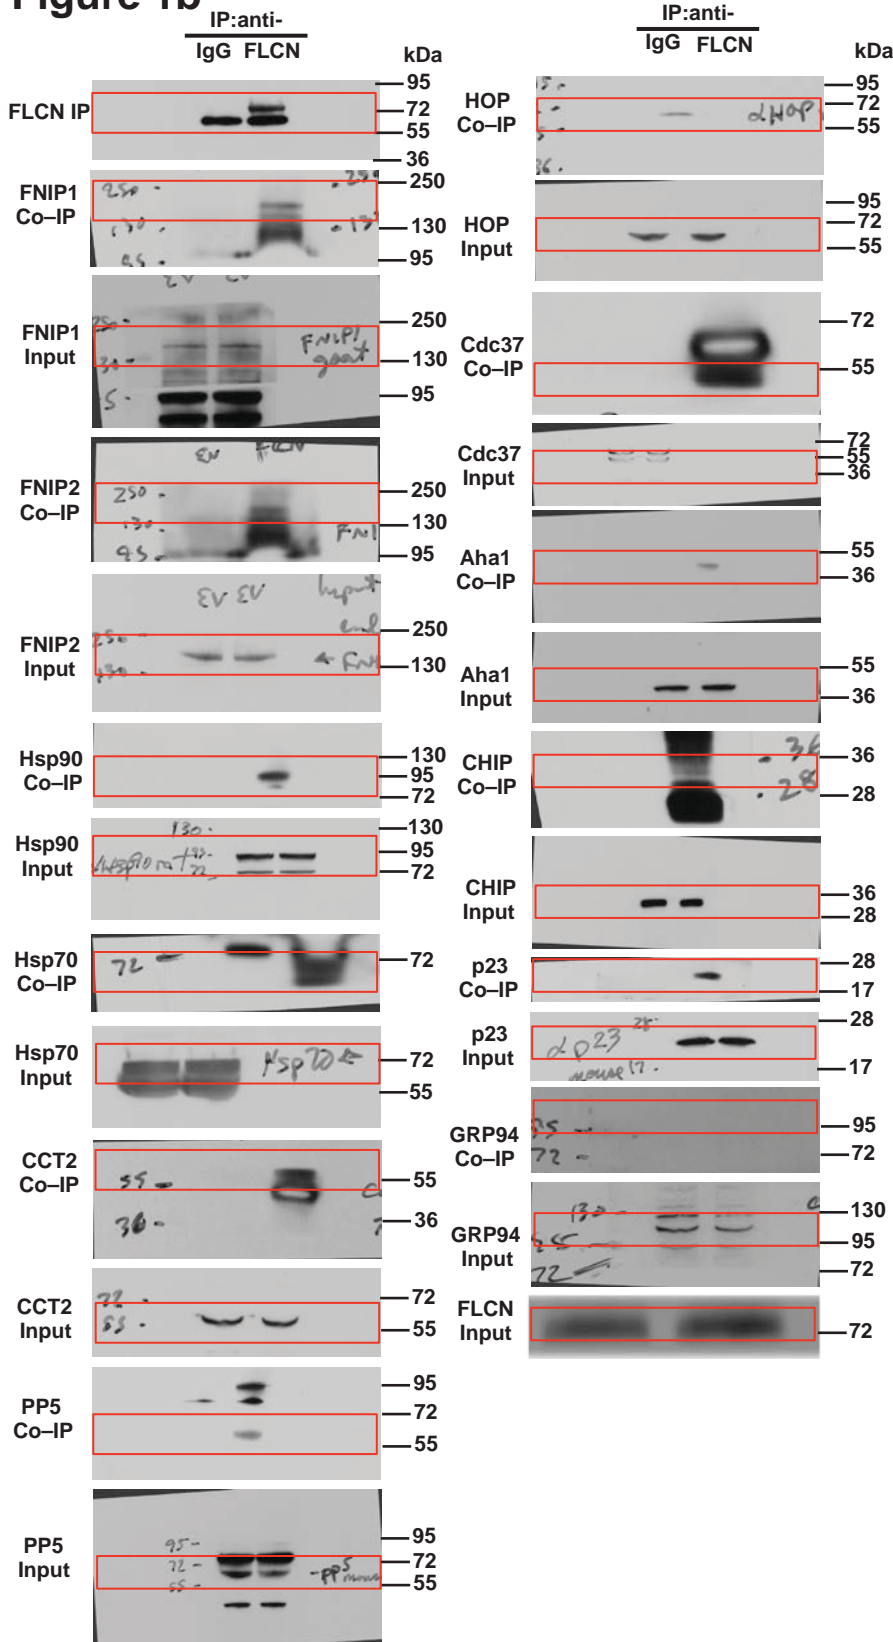

## Figure 1c

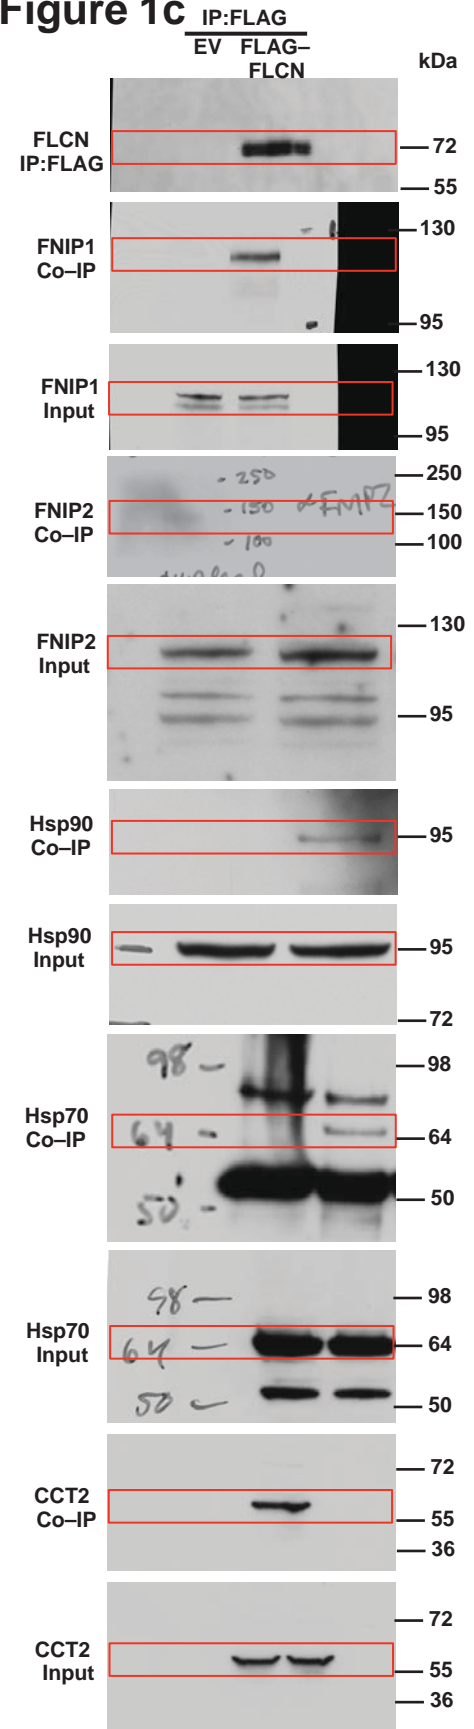

**Figure 1c continued**

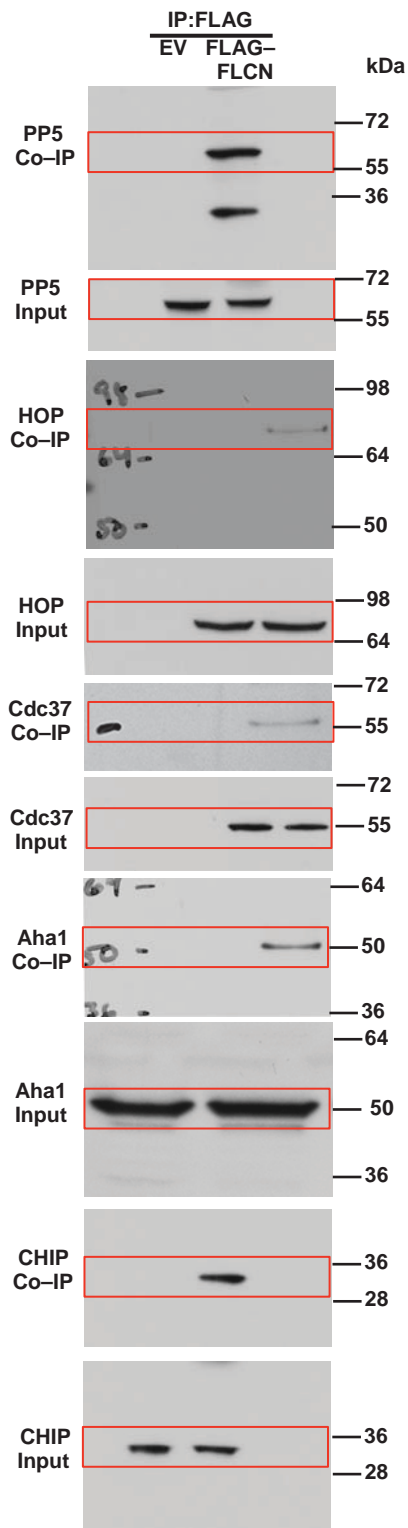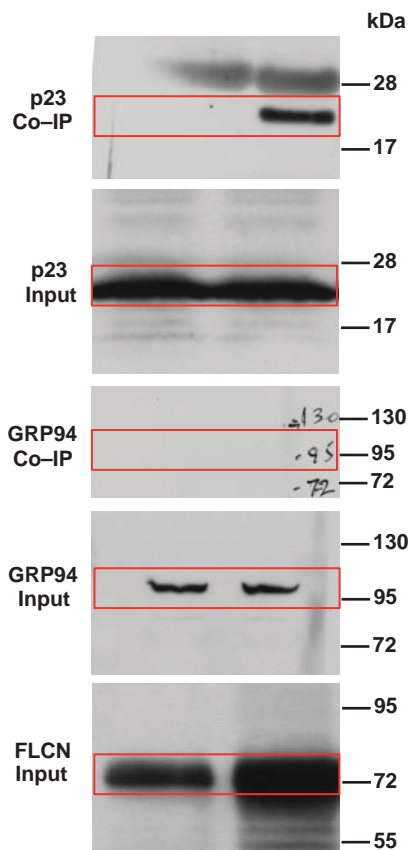

**Figure 1d**

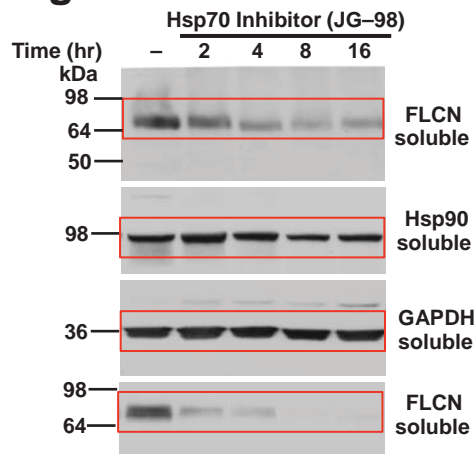

**Figure 1e**

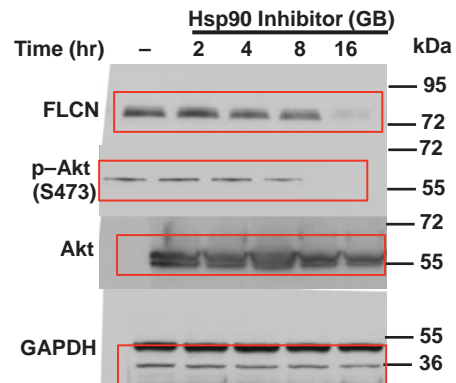

**Figure 1f**

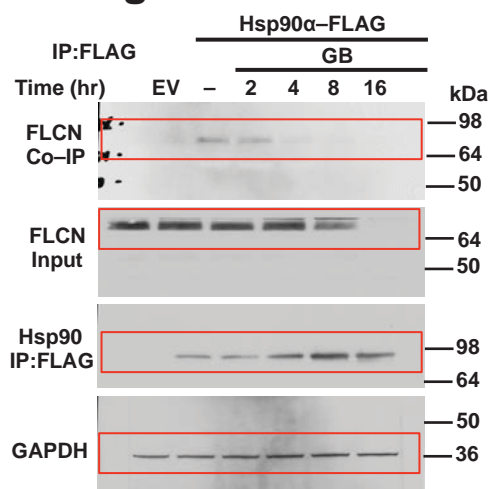



**Figure 1g**

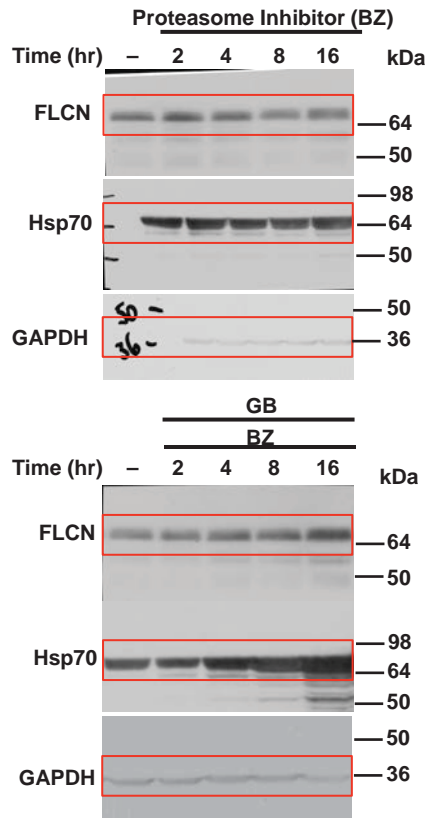

**Figure 1h**

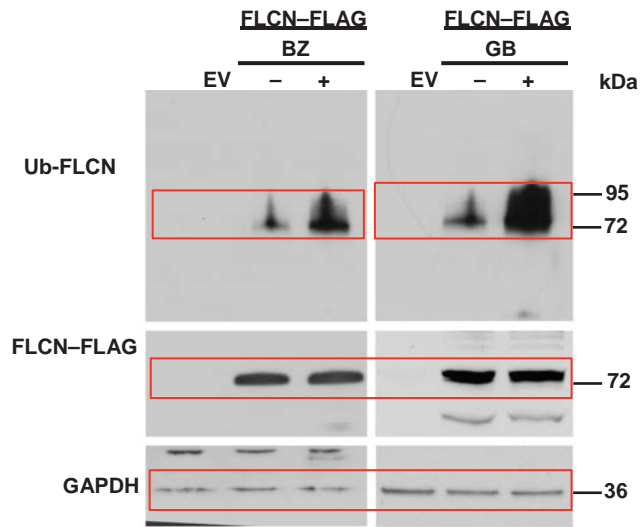



**Figure 2a**

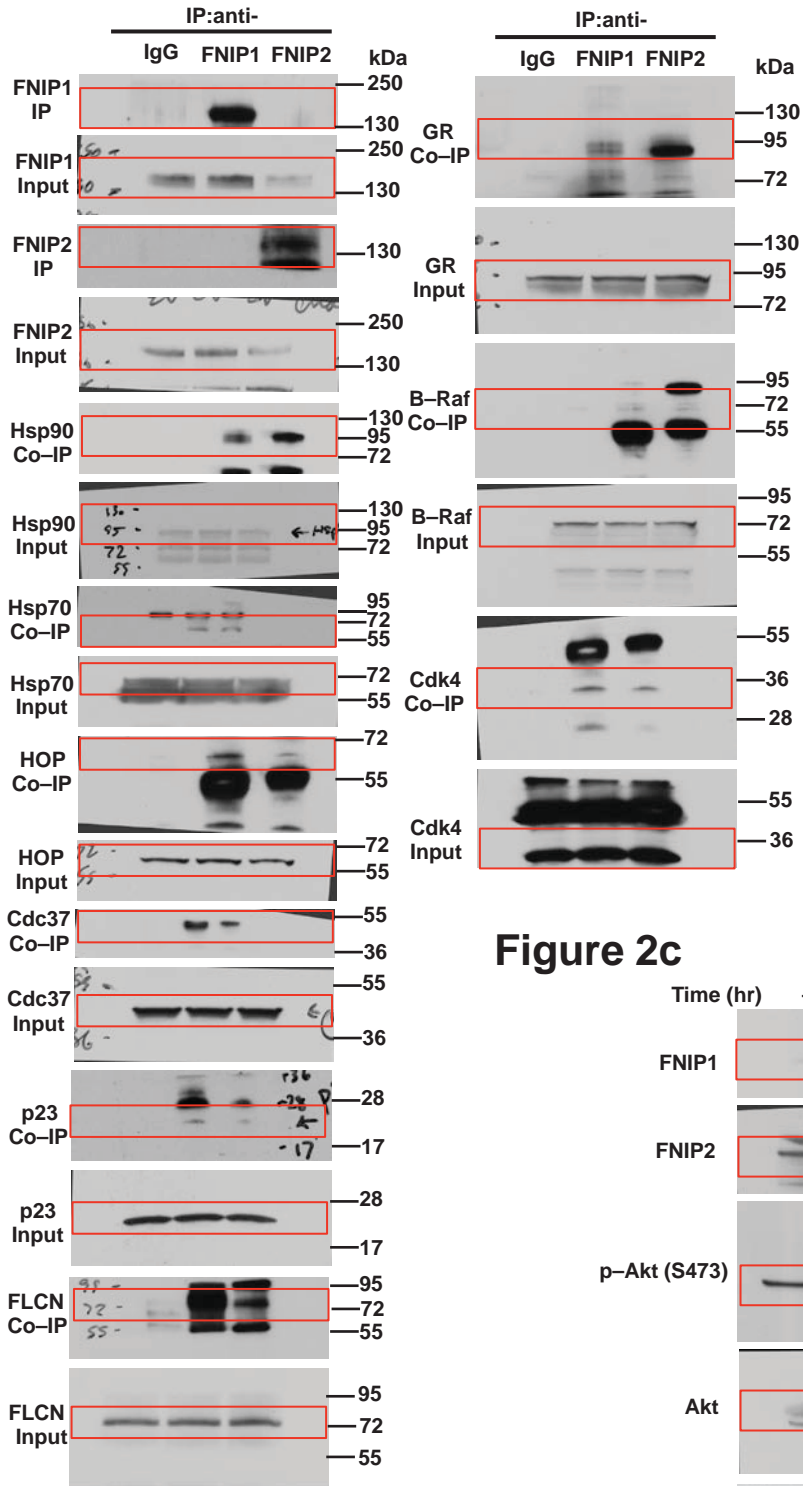

**Figure 2b**

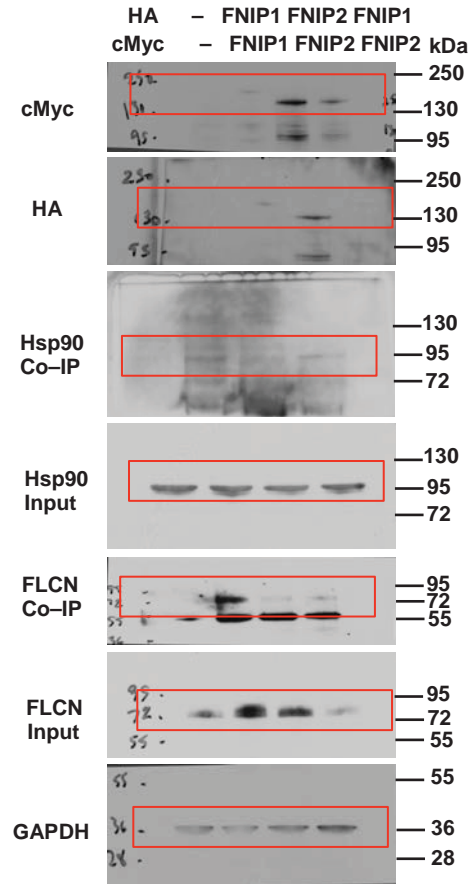

**Figure 2c**

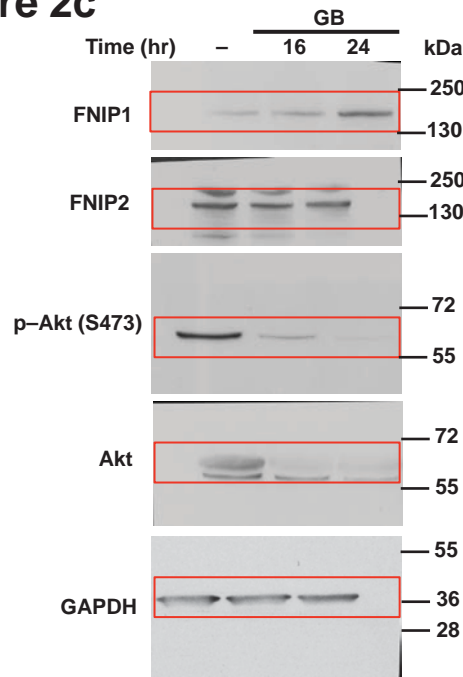

**Figure 2d**

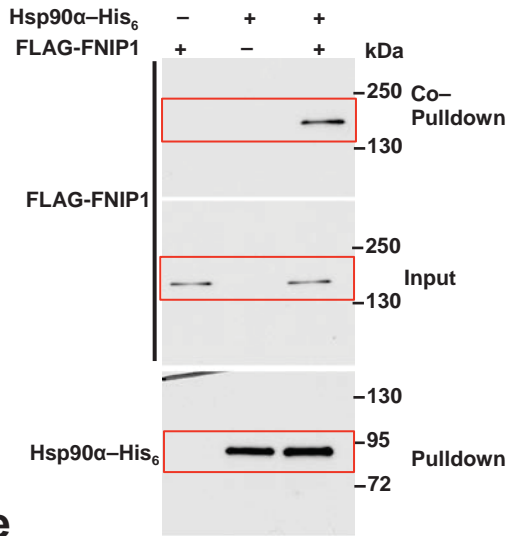

**Figure 2e**

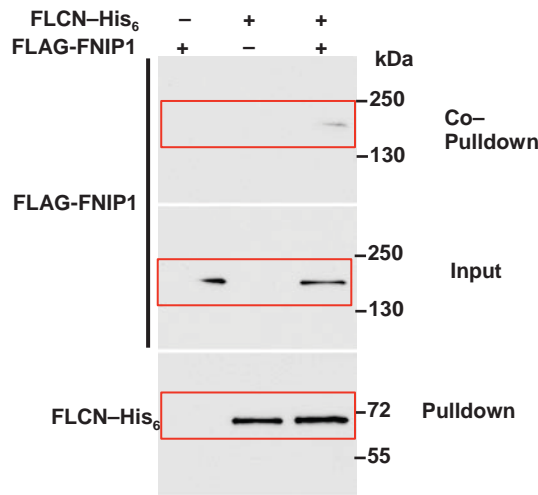

**Figure 2f**

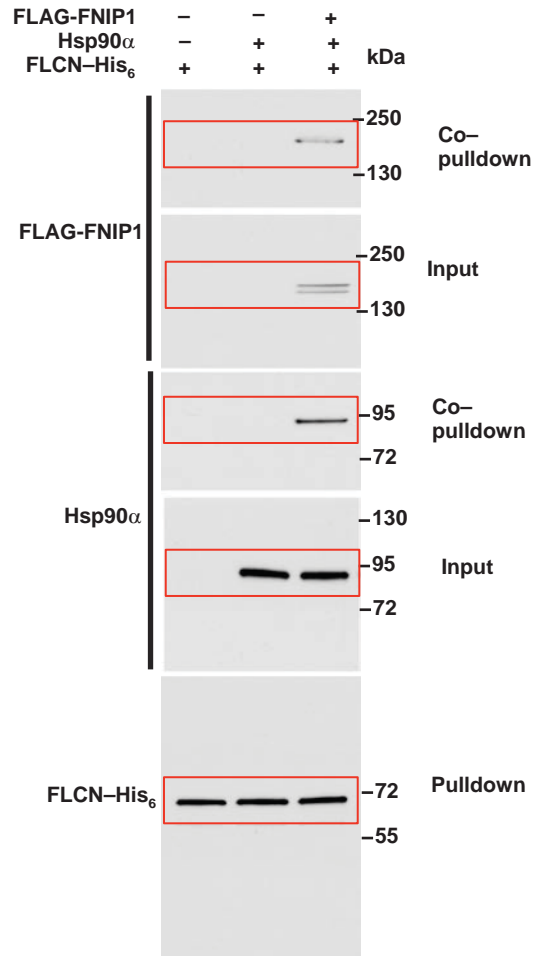

**Figure 3a**

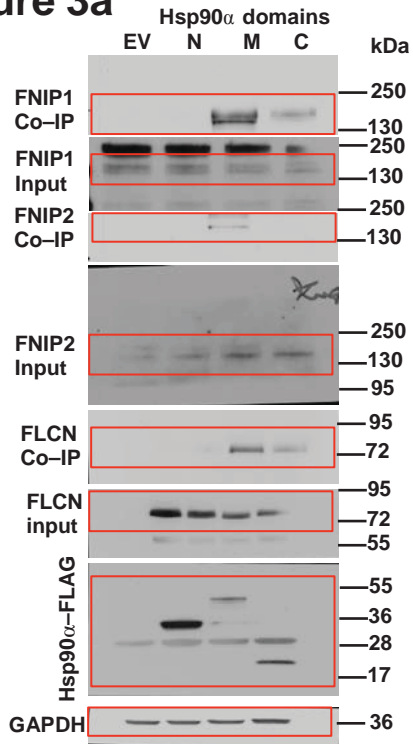

**Figure 3b**

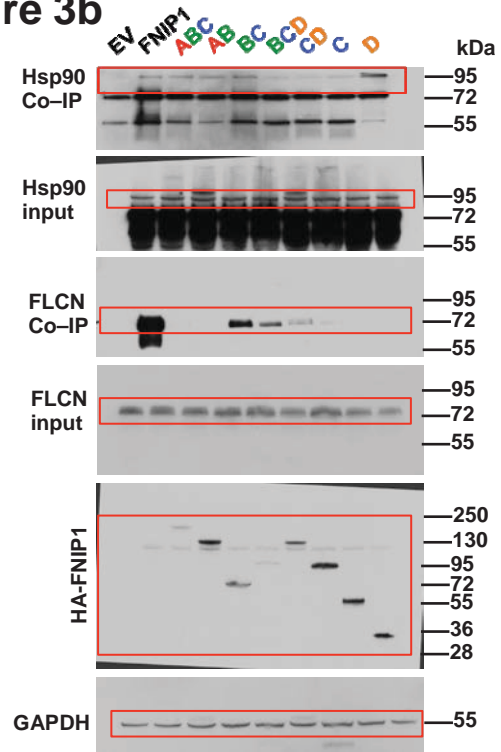

**Figure 3c**

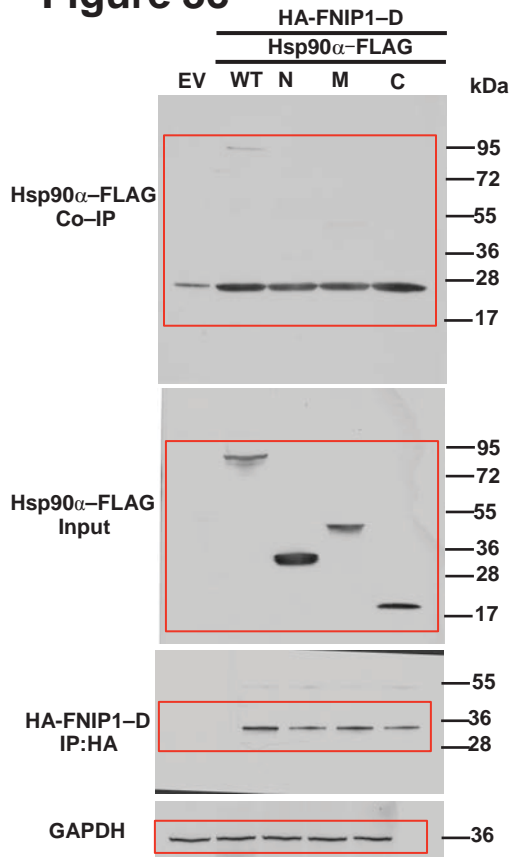

### Figure 4a

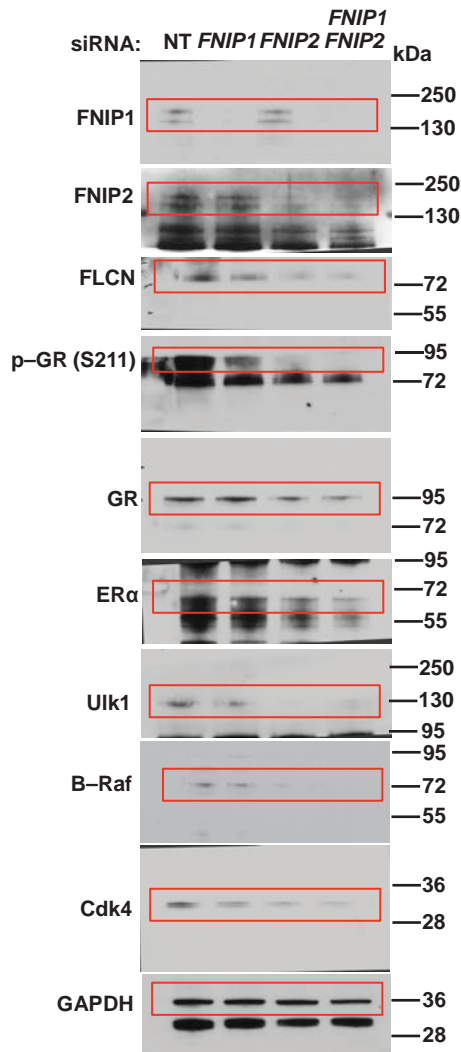

### Figure 4b

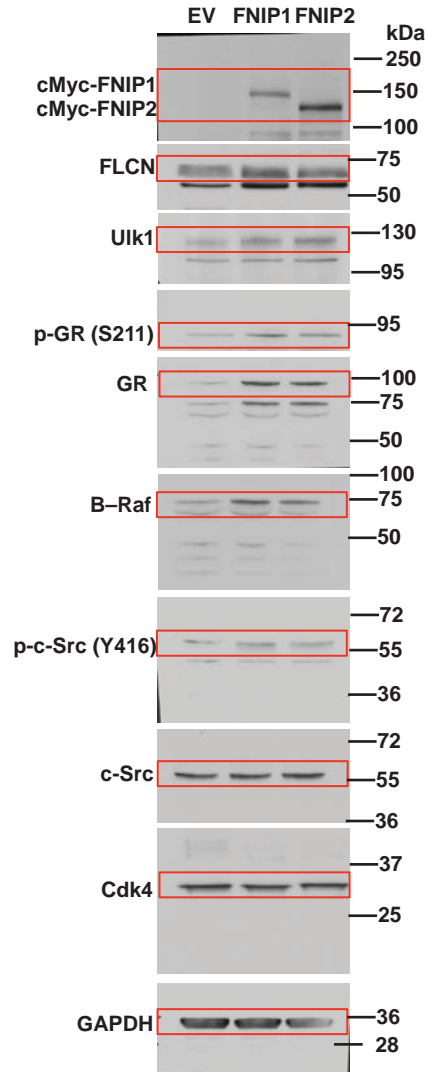

### Figure 4c

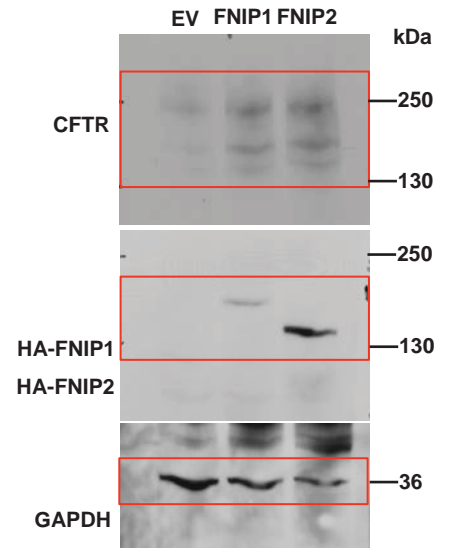

### Figure 5a

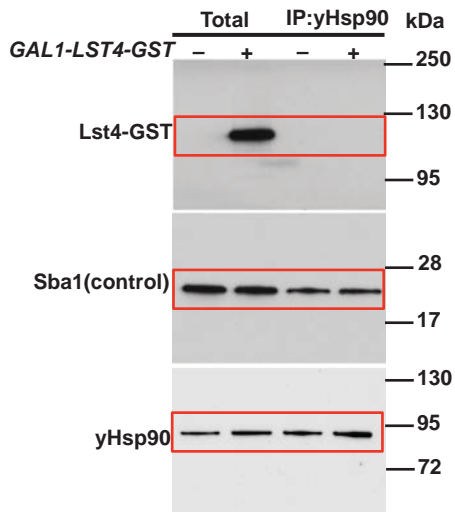

### Figure 5d

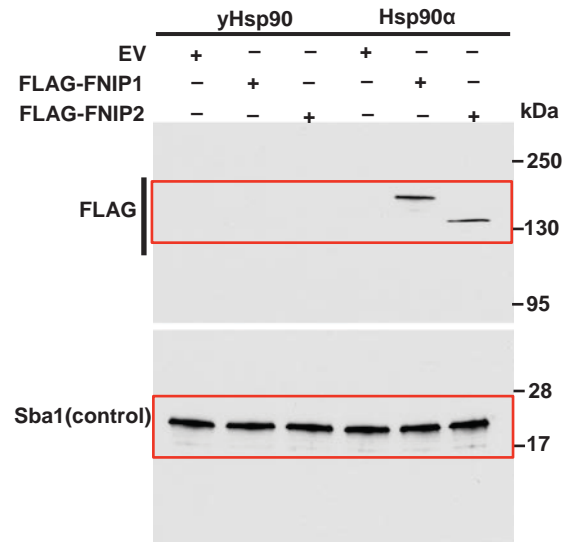

**Figure 6a**

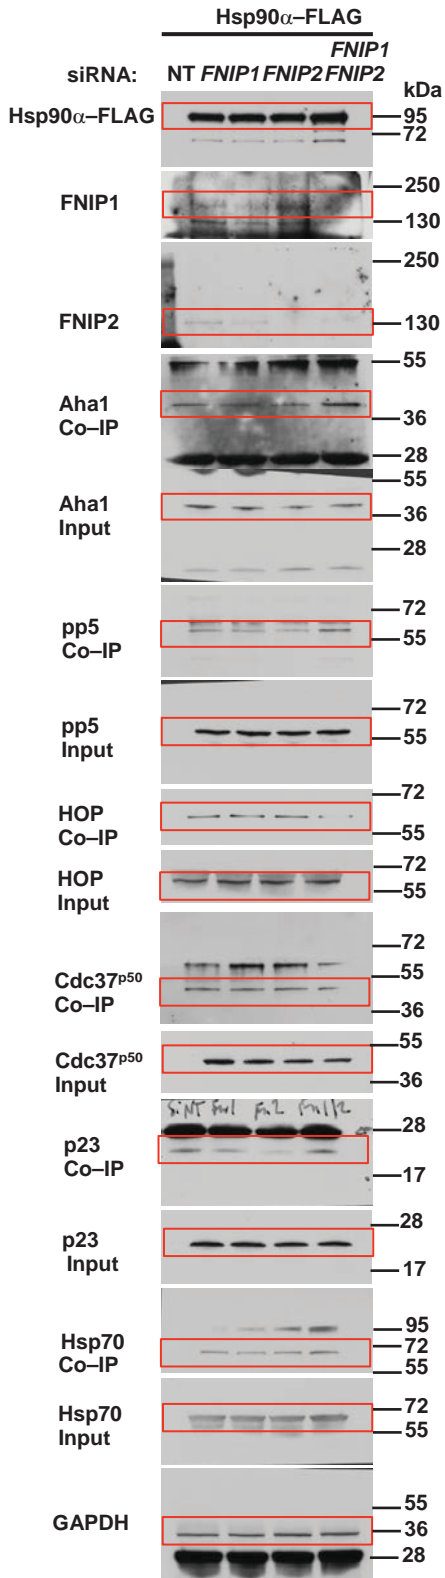

**Figure 6b**

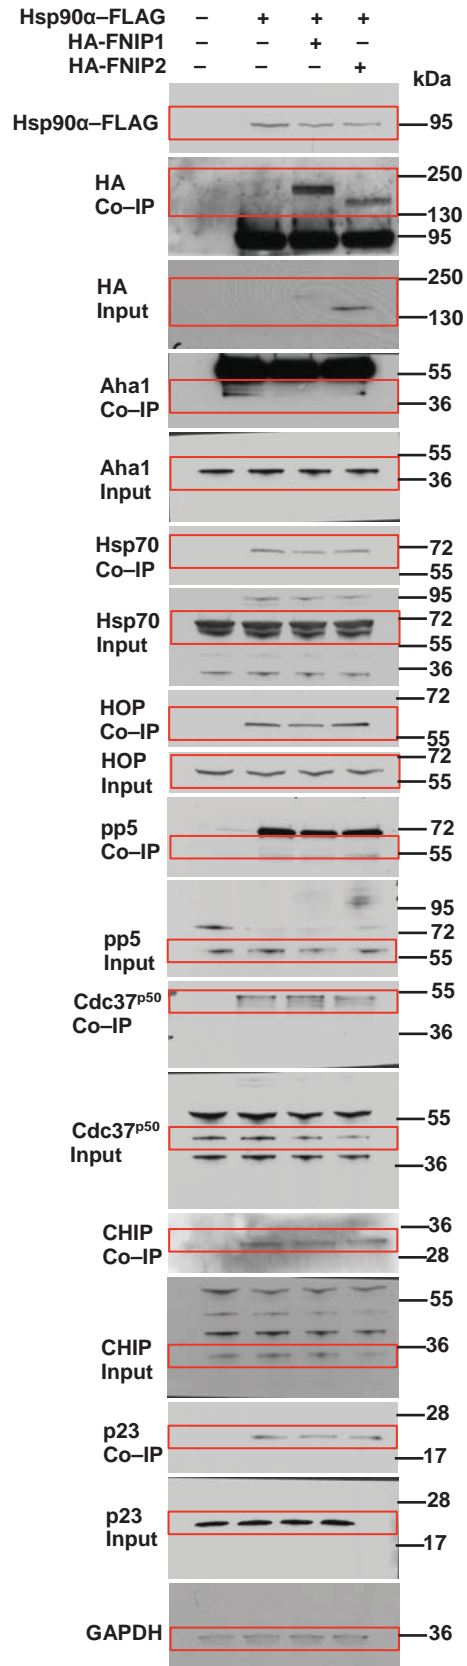

**Figure 6d**

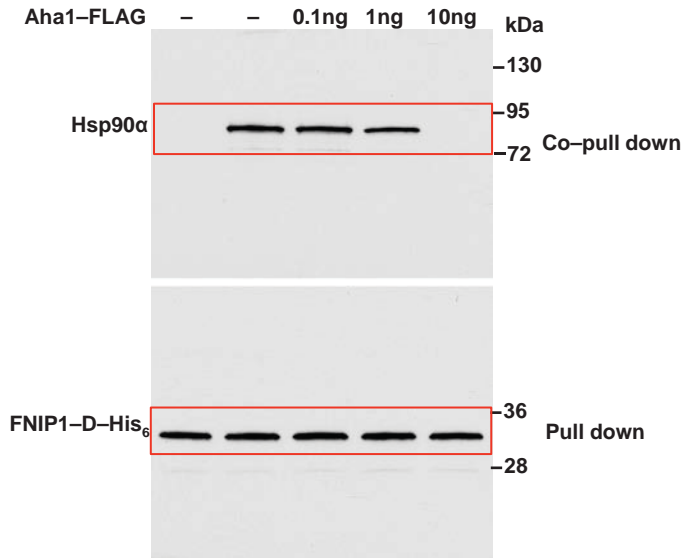

**Figure 6e**

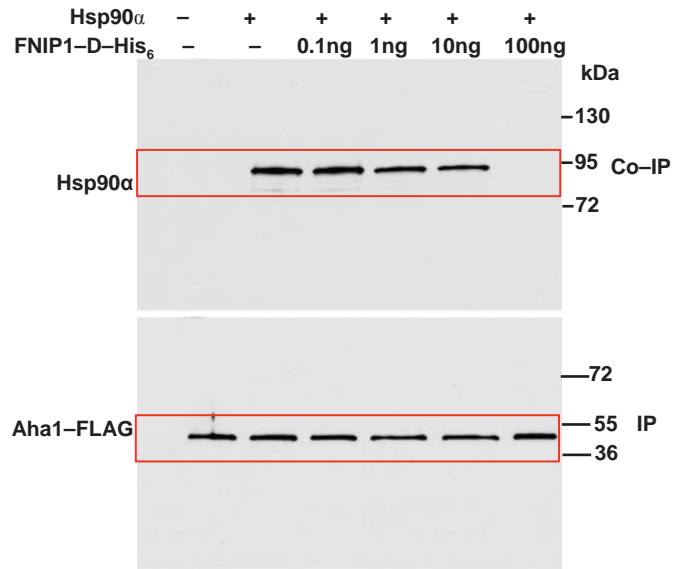

**Figure 7b**

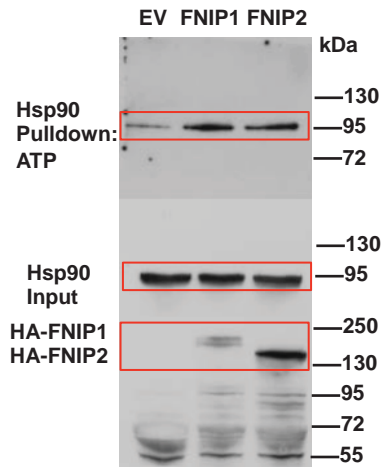

**Figure 7d**

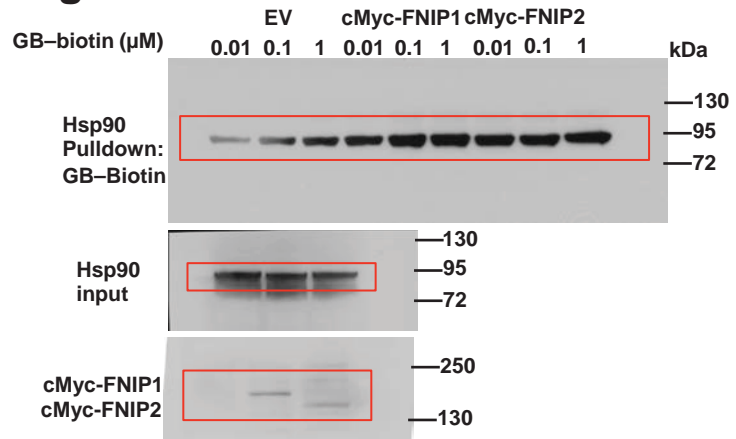

**Figure 7f**

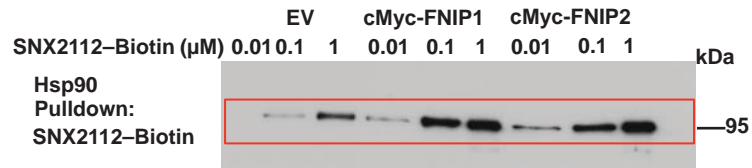

**Figure 7g**

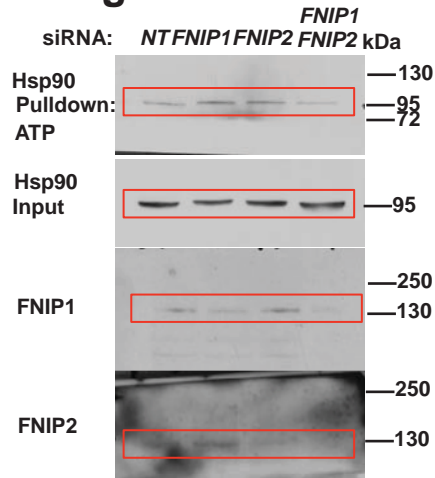

**Figure 7h**

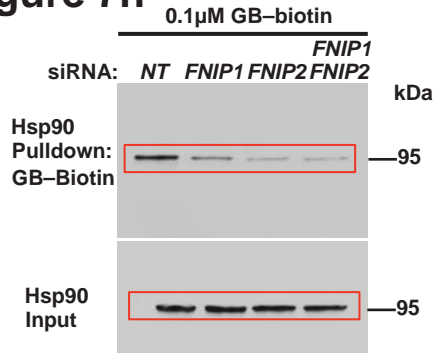



**Figure 8a**

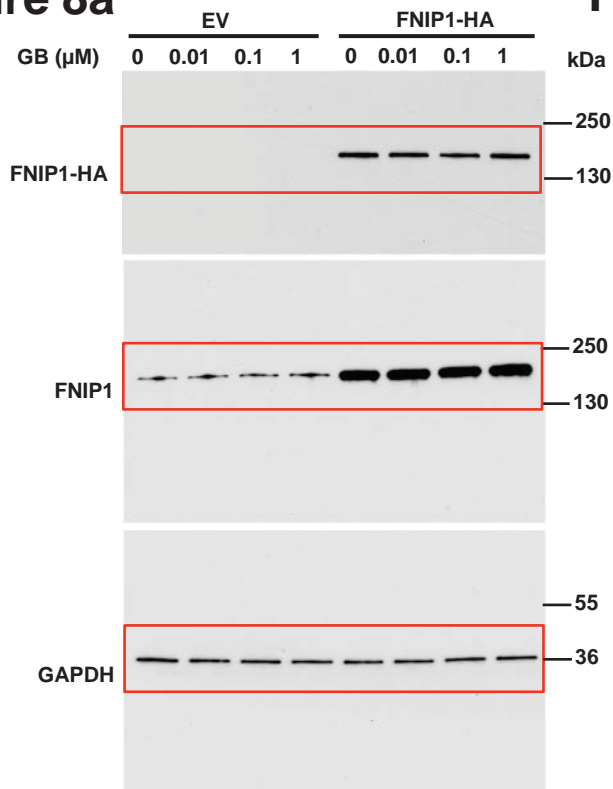

**Figure 8b**

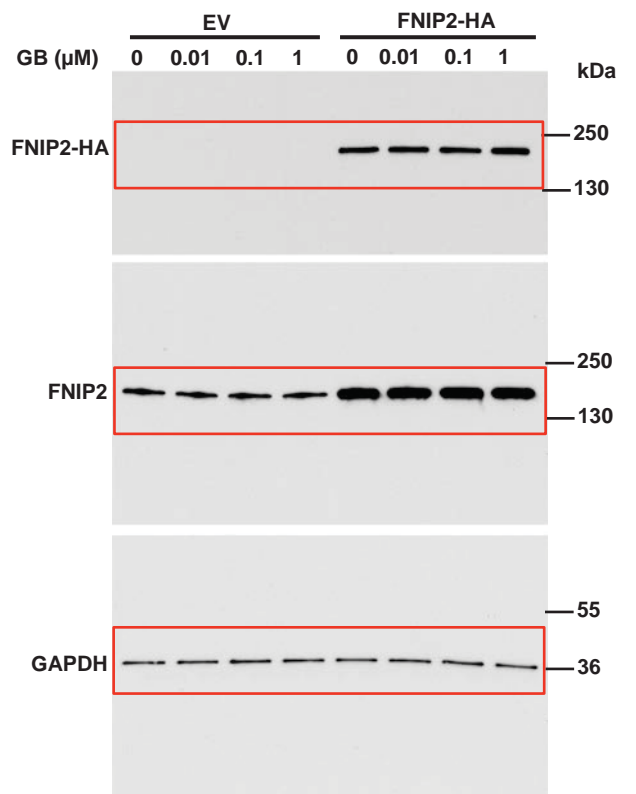

**Figure 8c**

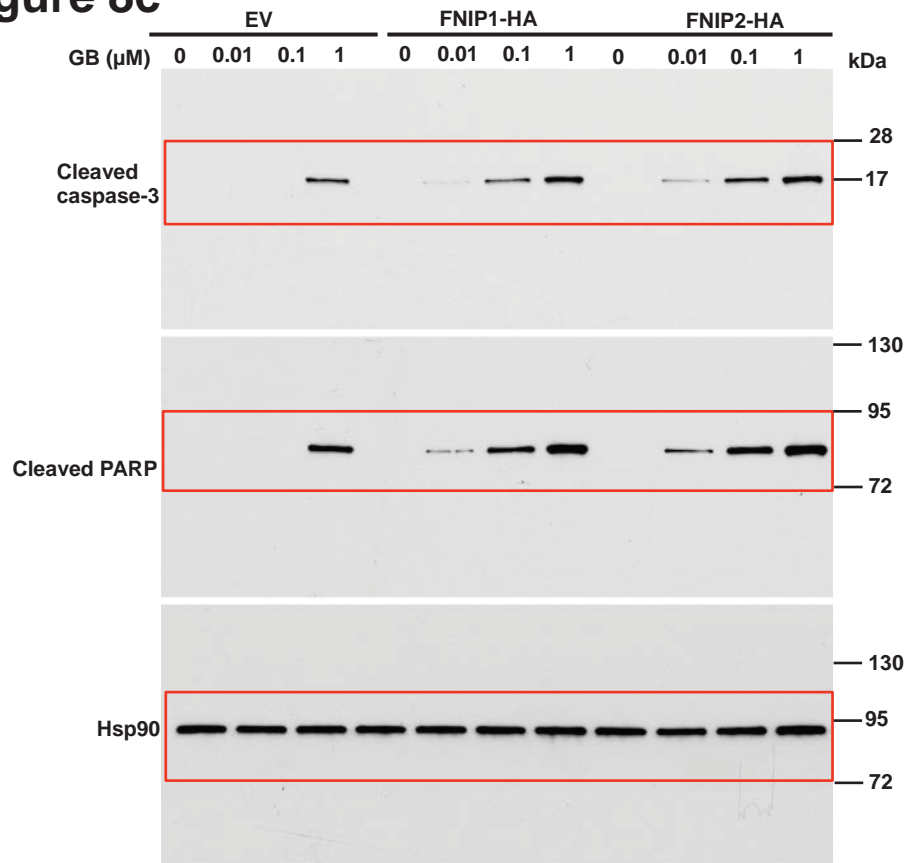

**Figure 8d**

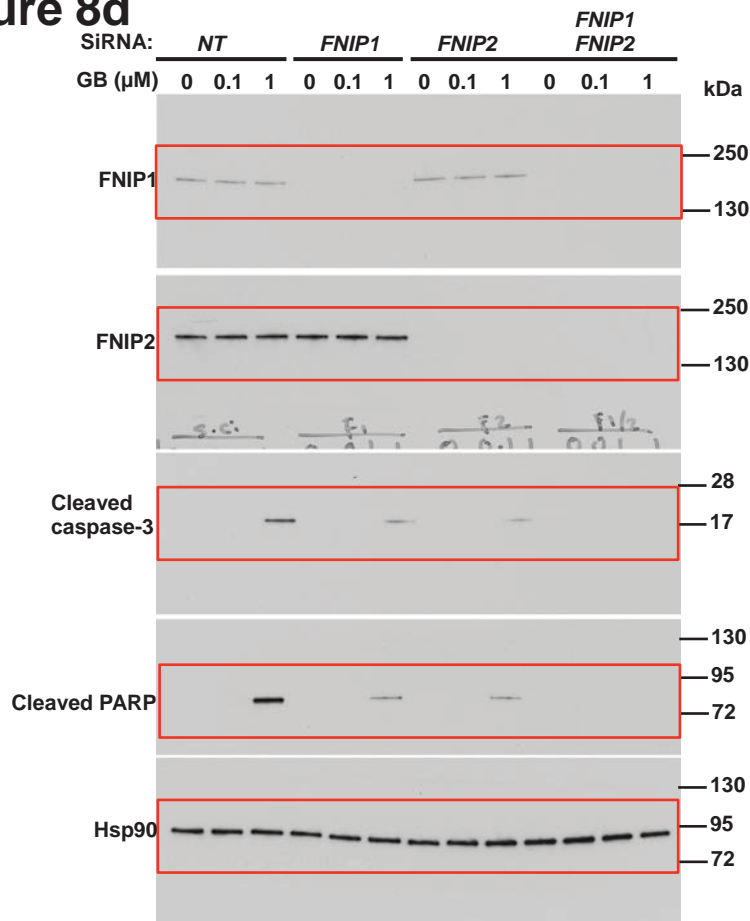

**Figure 9a**

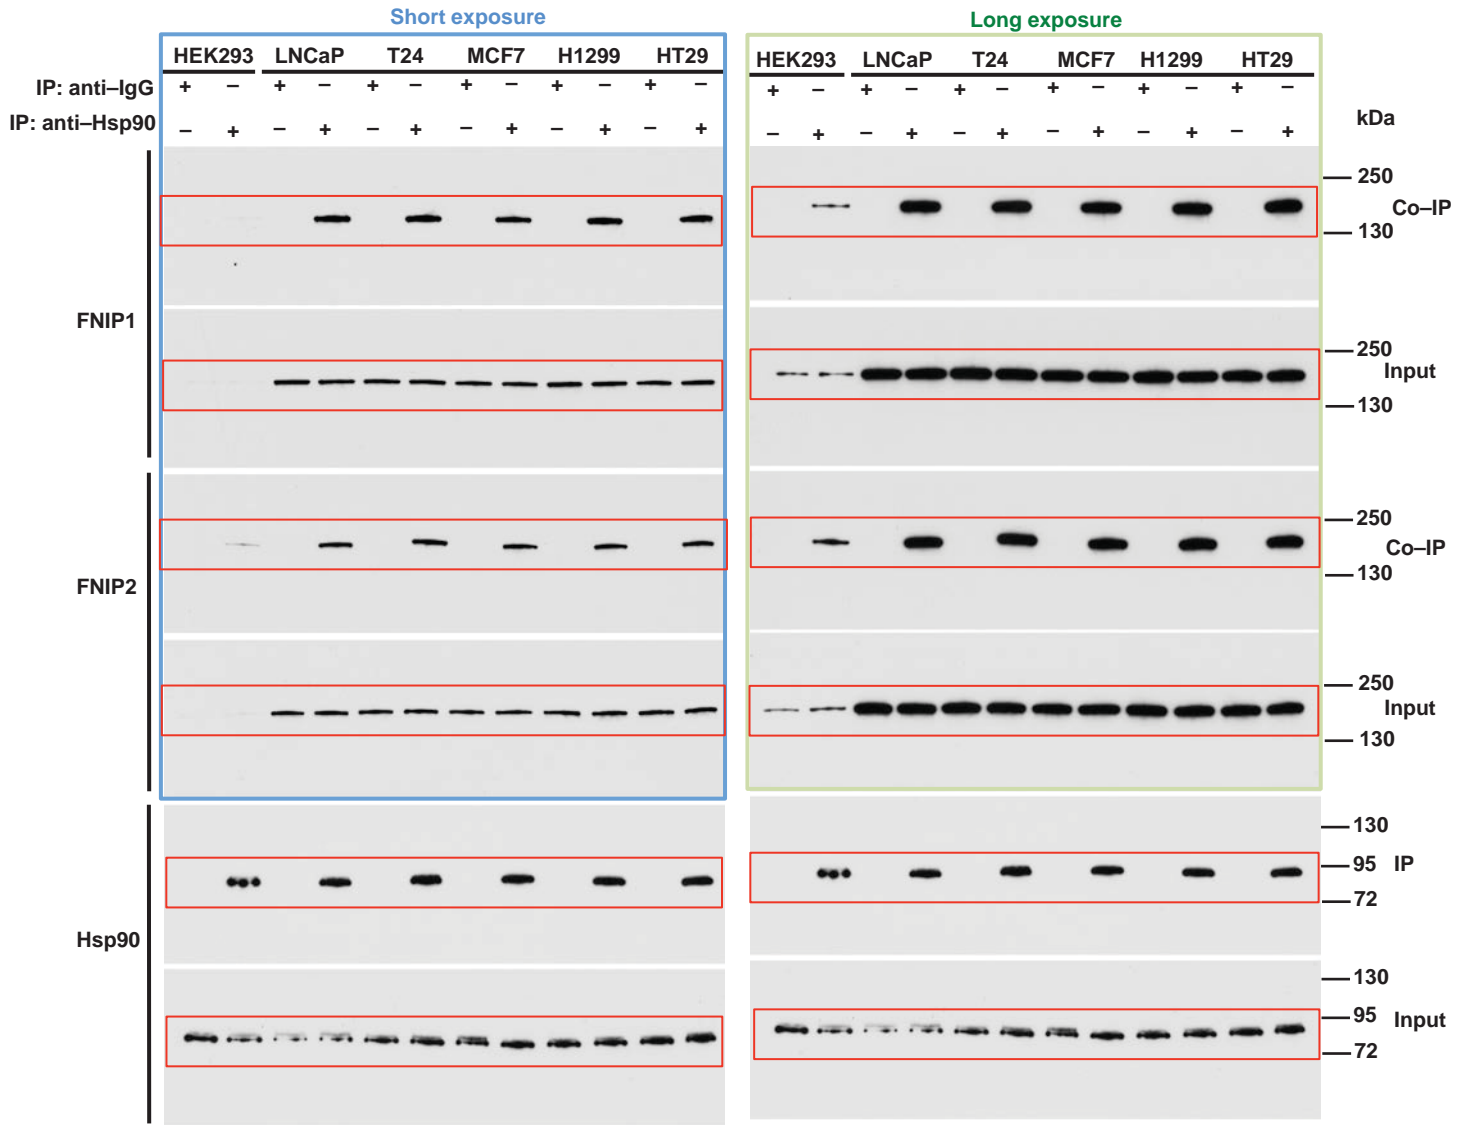

**Figure 9b**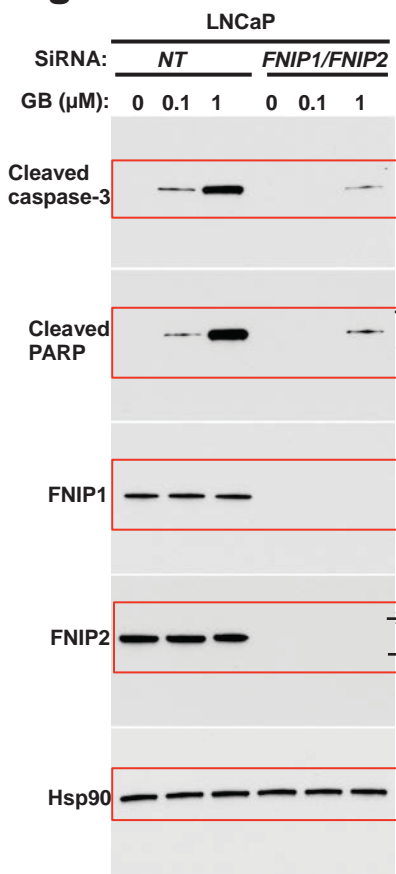**Figure 9c**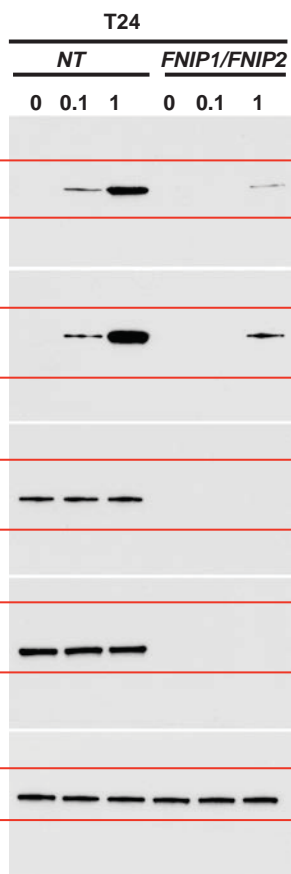**Figure 9d**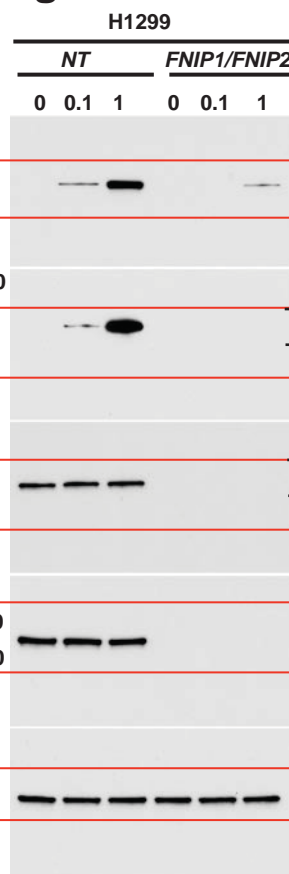**Figure 9e**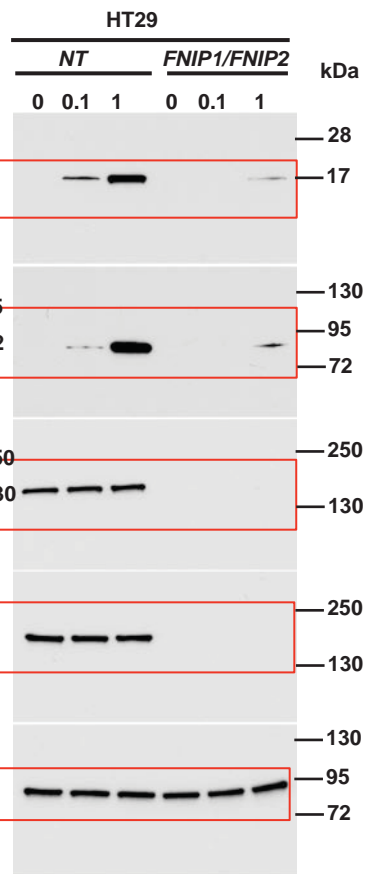**Figure 9f**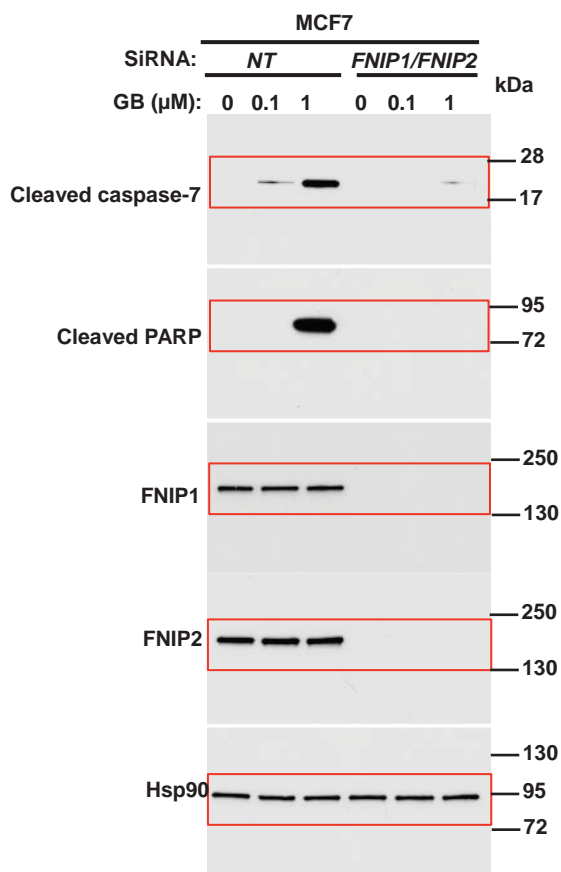



Figure 10f

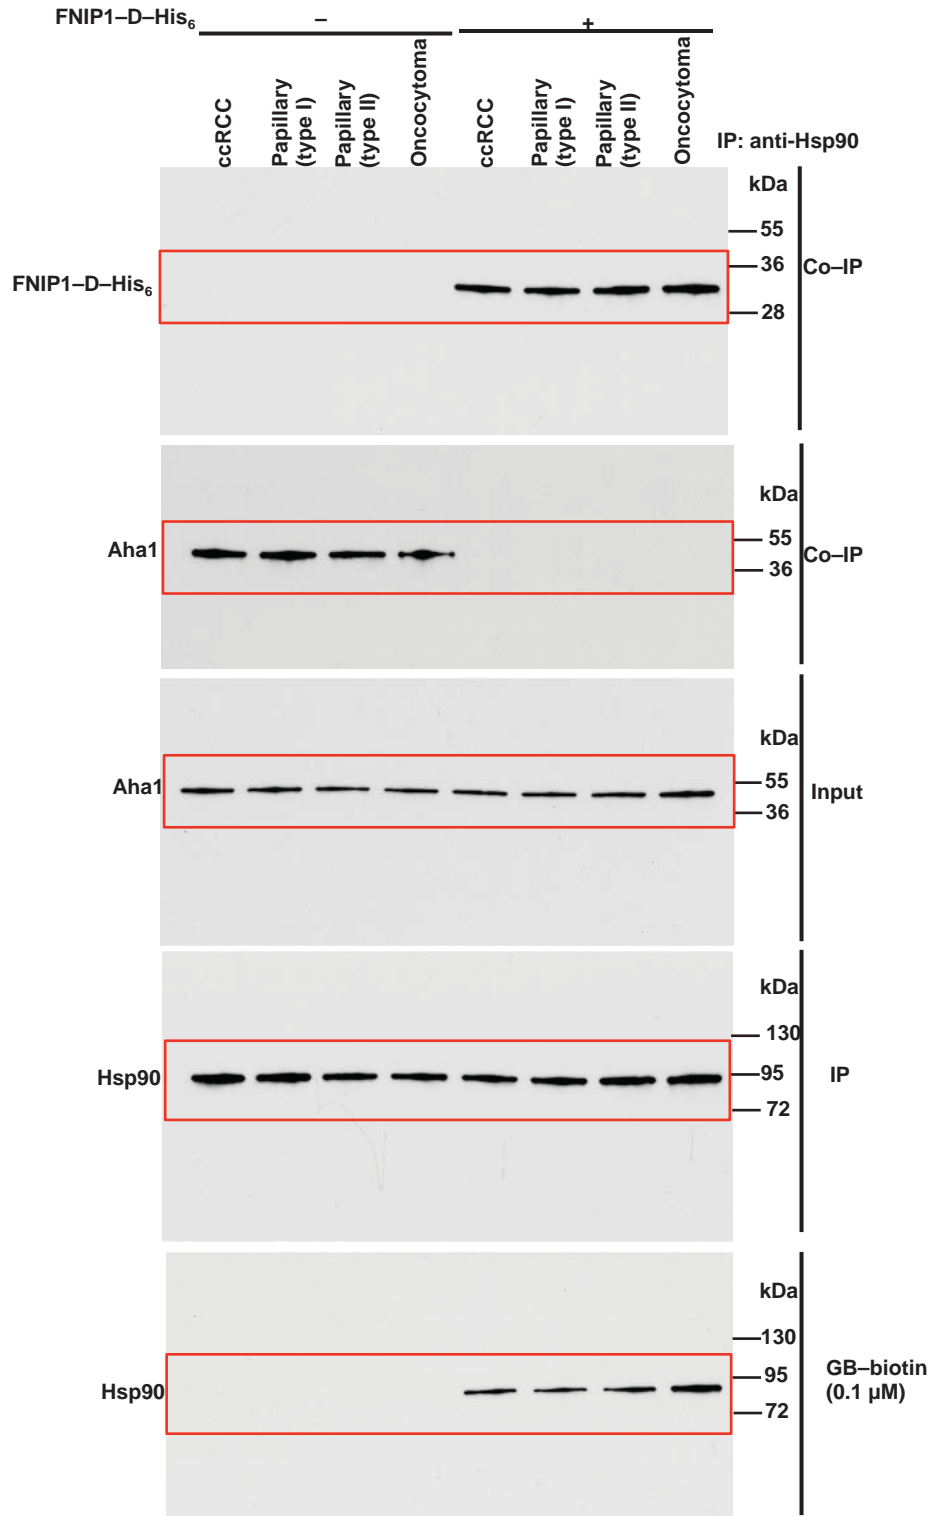

### Supp. Figure 1a

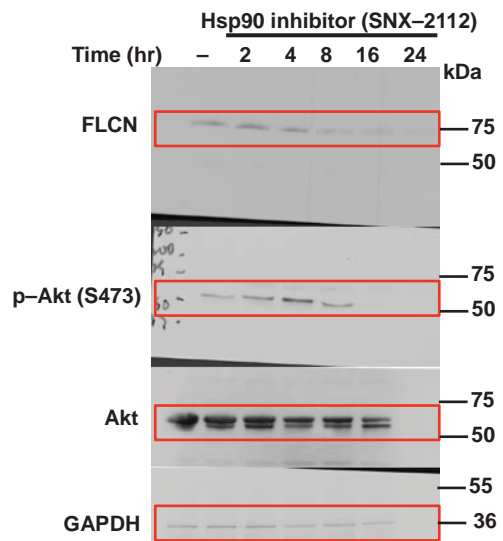

### Supp. Figure 1b

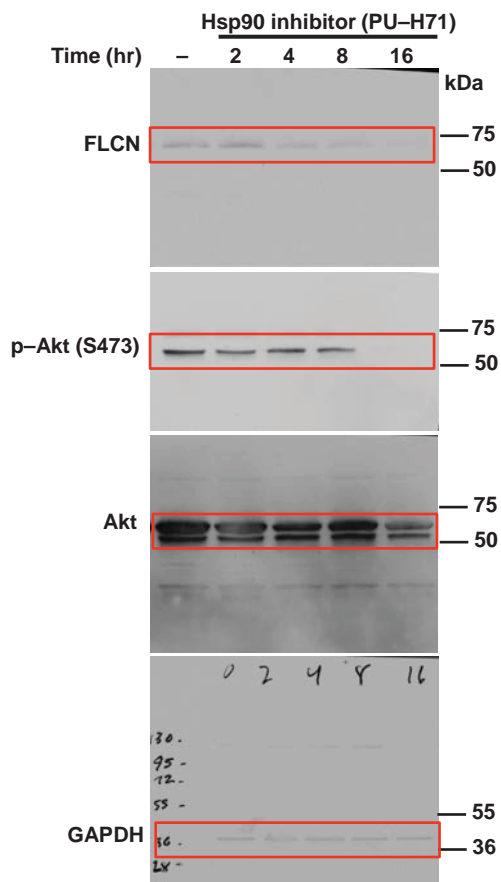

### Supp. Figure 1a

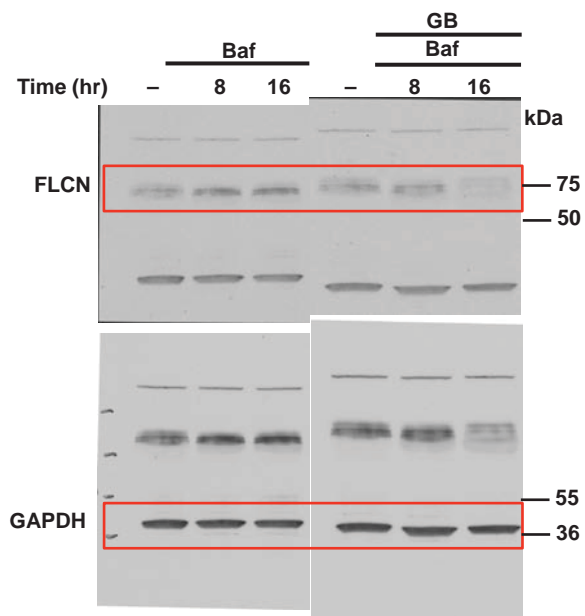



# Supp. Figure 2a

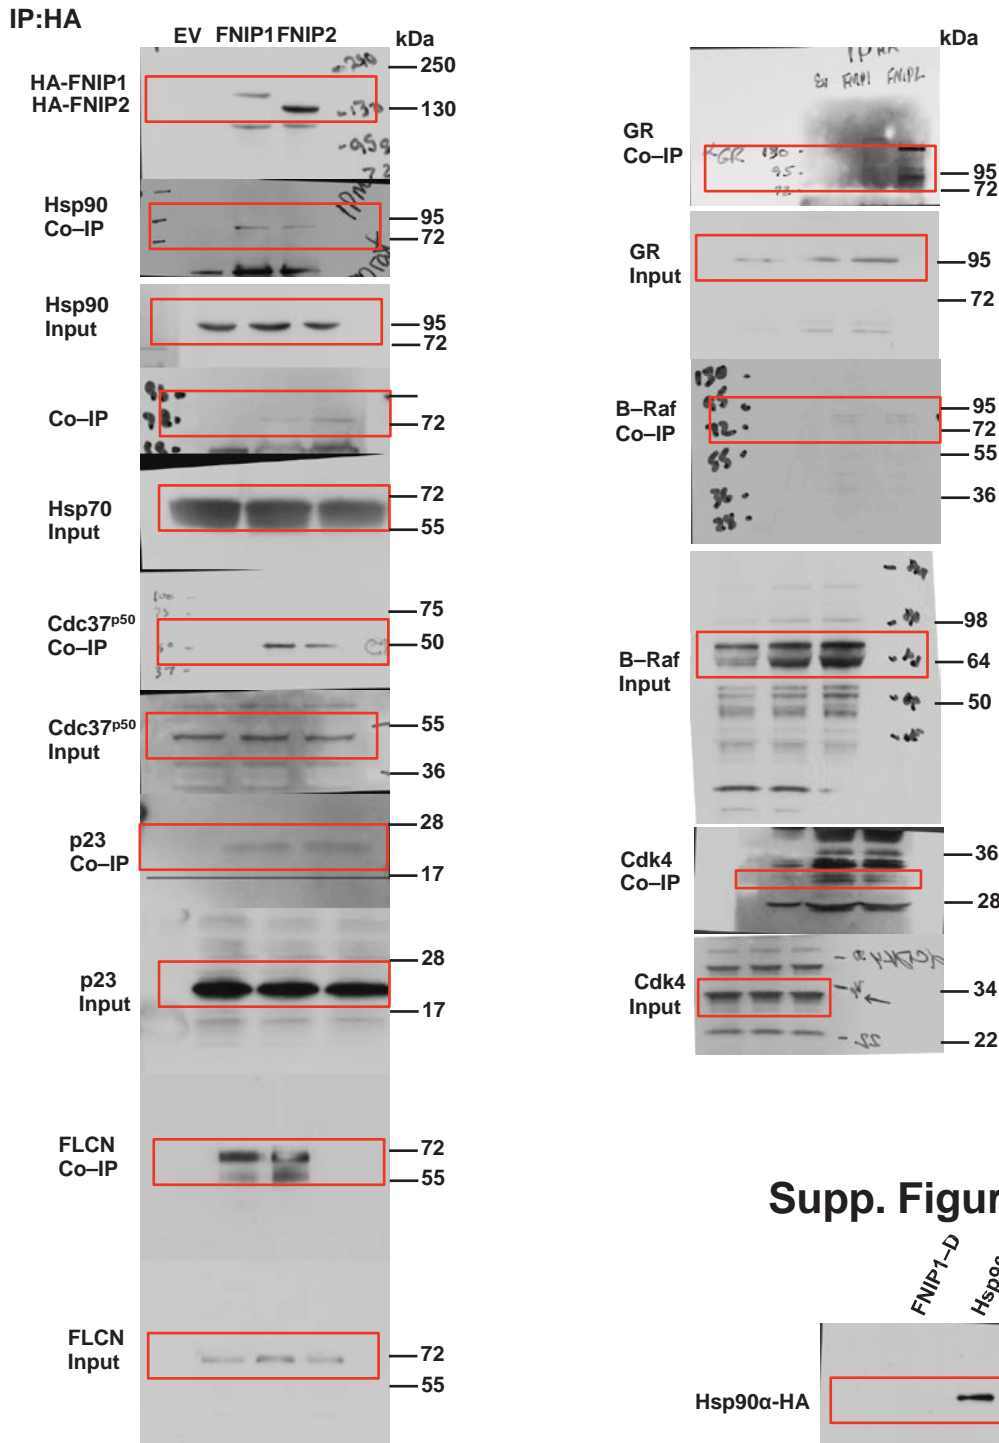

# Supp. Figure 2c

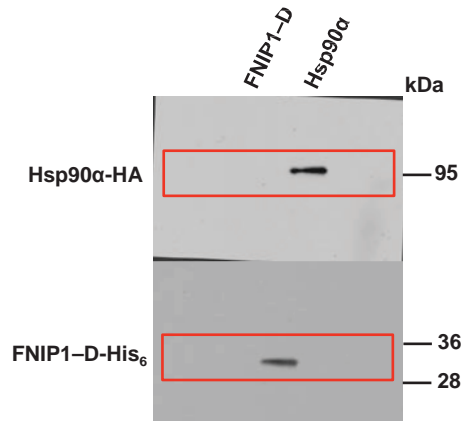

## Supp. Figure 4a

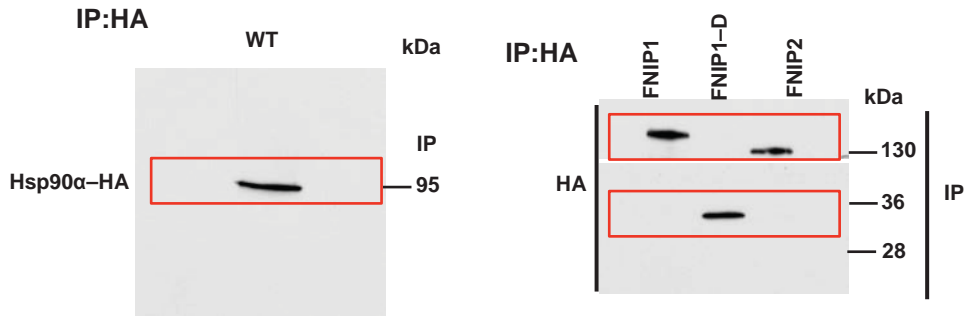

## Supp. Figure 5a

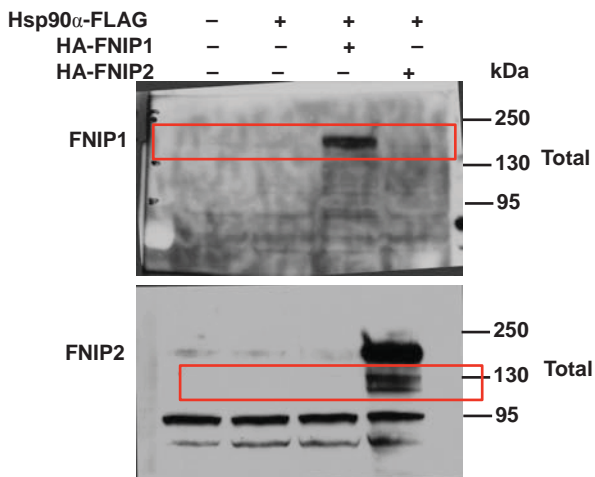

## Supp. Figure 5f

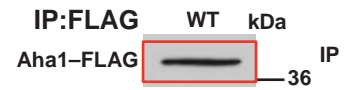

## Supp. Figure 5h

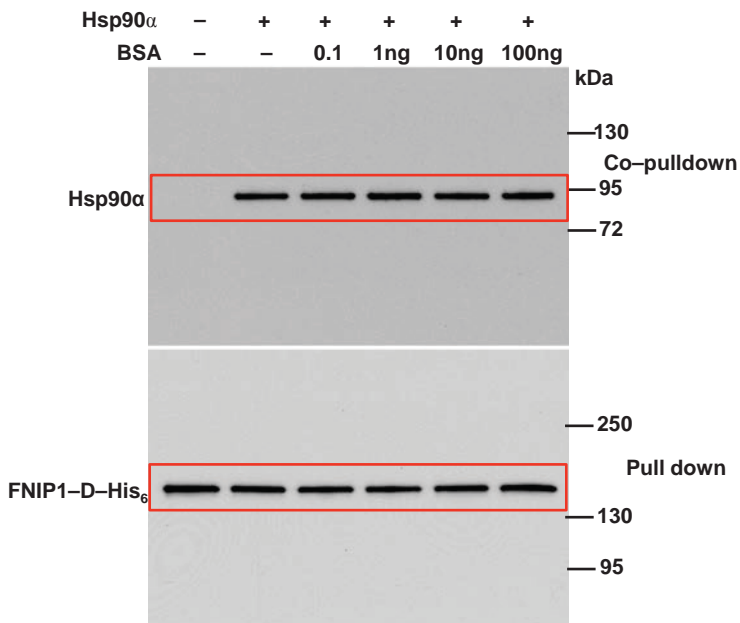

## Supp. Figure 5i

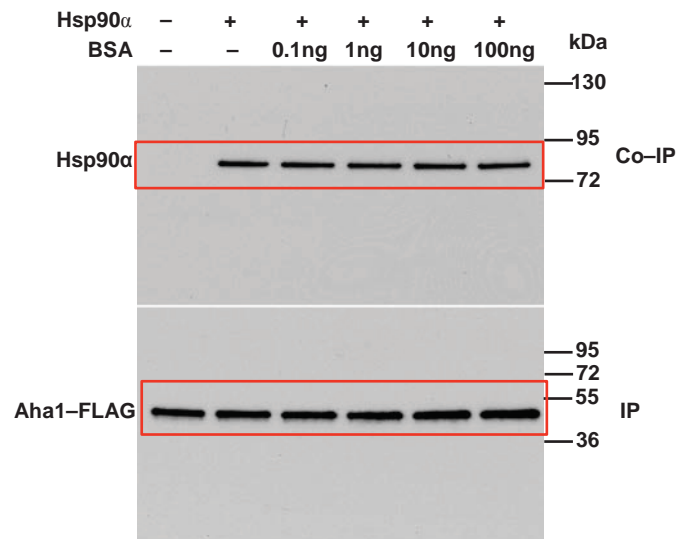

Supplementary Table 1. Cellular proteins associated with FLCN.

| Protein                                       | MW     | Protein Score | C.I.% | Total Ion Score | C.I.% | Peptides                                                                                                                                                                                                                                                                                                                                                                                                                                            | Accession Number |
|-----------------------------------------------|--------|---------------|-------|-----------------|-------|-----------------------------------------------------------------------------------------------------------------------------------------------------------------------------------------------------------------------------------------------------------------------------------------------------------------------------------------------------------------------------------------------------------------------------------------------------|------------------|
| Spliceosomal protein SAP 155                  | 145723 | 158           | 100   | 124             | 100   | HFVQHR<br>VLPPPAGYVPIR<br>MTPPIKDLLPR<br>RATVNTFGYIAK<br>LDDLVRPYVHK<br>DTPGHGSGWAETPR<br>IVDDLKDEAEQYRK<br>AGELKVVNGAAASQPPSK<br>IWDPTPSHTPAGAATPGR<br>EWMRICFELLELLK<br>TPDPKMNVRTYMDVMR<br>DYIYAVTPLLEDALMDR<br>LLVDVDESTLSPEEQKER<br>NRPLSDEELDAMFPEGYK<br>EDEYKHKHRTMISPER<br>YNSIYIGSQDALIAHYPR<br>AIGYLIPLMDAEYANYTR<br>IYNDKNTYIRYELDYIL<br>KLTATPTPLGGMTGFHMQTEDR<br>KPGYHAPWALLNDIPQSTEQYDPPFAEHRPPK<br>EIQGKKAALDEAQQVGLDSTGYDQEIYGGSDSR | gi 4033735       |
| Splicing factor 3b, subunit 3, 130kDa         | 135432 | N/A           | N/A   | 24              | 88    | FLAVGLVDNTR                                                                                                                                                                                                                                                                                                                                                                                                                                         | gi 46362557      |
| Heat shock protein HSP 90-alpha               | 98180  | 89            | 100   | 83              | 100   | VILHLKEDQTEYLEER<br>HSQFIGYPITLFEKER                                                                                                                                                                                                                                                                                                                                                                                                                | gi 153792590     |
| Heat shock 70 kDa protein 1A/1B               | 70009  | 222           | 100   | 173             | 100   | DEFEHK<br>LLQDFNFR<br>DAGVIAGLNVLR<br>LVNHFVEEFKR<br>LLQDFNFRDLNK<br>ATAGDTHLGGEDFDNR<br>IINEPTAAAIAYGLDR<br>NQVALNPONTVFDADR<br>LDKAIHDLVLVGGSTR<br>RLIGRKFQDPVQSDMK<br>GRLSKEIERMVQEAEK<br>STGKANKITITNDKGRLSK<br>QTQIFTTYSDNQPGVLIQVYEGER<br>TLSSSTQASLEIDSLFEGIDFYTSITR<br>MKEIAEAYLGPVTVNAVITVPAYFNDSQR<br>VEIANDQGNRTTPSYVAFTDTERLIGDAAK                                                                                                      | gi 167466173     |
| Chaperonin containing TCP1, subunit 8 (theta) | 59440  | 171           | 100   | 156             | 100   | GYEIACRK<br>FAEAFEAI PR HFSGLEEA VYR<br>LFTVNDAAATLR<br>HEKEDGAISTIVLR<br>MALHVPKAPGFAQMLK<br>VDQIIMAKPAGGPKPPSGKK<br>YNIMLVRLNSKWDLRR<br>VADMALHYANKYNIMLVR<br>TAEELMNFSGEENLMDAQVK<br>ELAQTTRTAYGPNGMNKMVINHLEK<br>RLVPGGGATEIELAKQITSYGETCPGLEQYAIKK                                                                                                                                                                                             | gi 119630329     |

|                                                       |       |     |     |     |     |                                                                                                                                                                                                                                                                                                                     |              |
|-------------------------------------------------------|-------|-----|-----|-----|-----|---------------------------------------------------------------------------------------------------------------------------------------------------------------------------------------------------------------------------------------------------------------------------------------------------------------------|--------------|
| T-complex protein 1 subunit beta                      | 57424 | 94  | 100 | 27  | 92  | VPDHHPC<br>LIEEVMIGEDK GATQQILDEAER<br>LLTHHKDHFTK<br>QDLMNIAGTTLSSK<br>TPGKEAVAMESYAKALK<br>RQVLLSAAEAAEVILR<br>EALLSSAVDHGSDEVKFR<br>IHPQTIAGWREATKAAR<br>LALVTGGGIASTFDHPPELVK<br>VDSTAKVAEIEHAEKEKMKKEK<br>EGTIGDMAILGITESFQVQR<br>VQDDEVGDGTTSTVLAELLR<br>ALKMLPTIADNAGYDSADLVAQLR<br>RIENAKILIANGMDDTKIKIFGSR | gij197692147 |
| T-complex protein 1 subunit eta                       | 59329 | N/A | N/A | 60  | 100 | QVKPYVEEGLHPQIIIR                                                                                                                                                                                                                                                                                                   | gij5453607   |
| T-complex protein 1 subunit delta                     | 57888 | N/A | N/A | 47  | 100 | ALIAGGGAPEIELALR                                                                                                                                                                                                                                                                                                    | gij38455427  |
| Activator of 90 kDa heat shock protein ATPase homolog | 38250 | 192 | 100 | 131 | 100 | WGEGDPR<br>WIVEER<br>TQARPVGVK<br>GIPAPEEERTR<br>LDGEASINNRK<br>NGETELCMEGR<br>LIFFYEWSVK<br>YYFEGIKQTFGYGAR<br>VFTTQELVQAFTHAPATLEADRGGK<br>ADATNVNNWHWTERDASNWSTDKCLK                                                                                                                                             | gij6912280   |
| E3 ubiquitin-protein ligase CHIP                      | 34834 | 119 | 100 | 107 | 100 | LIAAERER<br>VGHFDPVTR<br>NPLVAVYYTNR<br>LNFDDIPSALR<br>RIHQESELHSYLSR<br>ISFELMREPCITPSGITYDR                                                                                                                                                                                                                       | gij56181387  |
| Ribosomal protein L10                                 | 25067 | 68  | 96  | 35  | 99  | GAFGKPKQGTVAR<br>VRLHPFHVIR ICANKYMKSCGK<br>INKMLSCAGADRLQGTGMR<br>SRFCRGVPDAKIRIFDLGR<br>LQTGMRGAFGKPKQGTVARVHIGQVIMSIRTK                                                                                                                                                                                          | gij119593144 |

Supplementary Table 2. siRNA sequences.

| Name                 | Sequences           |
|----------------------|---------------------|
| FNIP1-1              | CCCAGGAAUUGUGCGGAAA |
| FNIP1-2              | AAGCAUAACUUGUCUCCAA |
| FNIP1-3              | GCAAAGACUCAUCCAUAUA |
| FNIP1-4              | GCACAAAUACUCCUUUAAU |
| FNIP2-1              | GGACAGUGGCAUUGCUCGA |
| FNIP2-2              | AUAAAGAGGCACCGCAAGA |
| FNIP2-3              | GAAAGAAUUAGGUGUCGUA |
| FNIP2-4              | CCUCGUGGCUGGUGCGAAU |
| NON-TARGETING POOL-1 | UGGUUUACAUGUCGACUAA |
| NON-TARGETING POOL-2 | UGGUUUACAUGUUGUGUGA |
| NON-TARGETING POOL-3 | UGGUUUACAUGUUUUCUGA |
| NON-TARGETING POOL-4 | UGGUUUACAUGUUUCCUA  |

Supplementary Table 3. Primer sequences. Restriction sites are highlighted in green. Epitope sequences are highlighted in blue.

| Primer               | Sequence                                                                  |
|----------------------|---------------------------------------------------------------------------|
| FLAG-Hsp90-N-BamHI-F | TATGCGGGATCCATGGATTACAAGGATGACGACGATAAGGGACCTGAGGAAACCCAGACCCAAGAC        |
| FLAG-Hsp90-N-XhoI-R  | CTCGGTCTCGAGTTACACAAAAAGAGTAATGGATATCCAATAAACTGAGA                        |
| FLAG-Hsp90-M-BamHI-F | TATGCGGGATCCATGGATTACAAGGATGACGACGATAAGGGAGATCAAGAAGAGCTCACAAAACA         |
| FLAG-Hsp90-M-XhoI-R  | CTCGGTCTCGAGTTATCTTAGGGCTTGAGCTTTCATGATTCTCTCCATGTTT                      |
| FLAG-Hsp90-C-BamHI-F | TATGCGGGATCCATGGATTACAAGGATGACGACGATAAGGGAGACAACCTCAACAATGGTTACATG        |
| FLAG-Hsp90-C-XhoI-R  | CTCGGTCTCGAGTTAGTCTACTTCTTCCATGCGTGATGTGTCGTCATCTCC                       |
| FLCN-Flag-Spe1       | CTCGTACACTAGTATGGACTACAAGGACGACGATGACAAGAATGCCATCGTGGCTCTCTGCC            |
| FLCN-R-Xho1          | CTAAGGACTCGAGTCAGTTCGAGACTCCGAGGCTGTG                                     |
| Fnip1-NheI-F         | TATGCGCTAGCGCCCCTACGCTGTTCCAGAAGCTCT                                      |
| Fnip1-XhoI-R         | CTCGGTCTCGAGTTAAAGGAGTATTTGTGCAACATATGGAG                                 |
| Fnip2-NheI-F         | TATGCGCTAGCGCCCCGACCCTGCTCCAGAAGCTCTTC                                    |
| Fnip2-XhoI-R         | CTCGGTCTCGAGTTATAAGAGTATTTGAGCCACATAAGGA                                  |
| Fnip1-NotI-F         | TATGCGCGGCCGCGCCCCTACGCTGTTCCAGAAGCTCT                                    |
| Fnip2-NotI-F         | TATGCGCGGCCGCGCCCCGACCCTGCTCCAGAAGCTCTTC                                  |
| Fnip1-KpnI-FLAG-F    | TATGCGGTACCATGGATTACAAGGATGACGATGACAAGGGATCCGCCCTACGCTGTTCCAGAAGCTCT      |
| Fnip2-KpnI-FLAG-F    | TATGCGGTACCATGGATTACAAGGATGACGATGACAAGGGATCCGCCCTACGCTGTTCCAGAAGCTCT      |
| Fnip1-SpeI-cMyc-F    | TATGCACTAGTATGGAACAAAAGTTAATCTCCGAAGAAGATTTAGCCCCTACGCTGTTCAGAAGCTCTT     |
| Fnip2-SpeI-cMyc-F    | TATGCACTAGTATGGAACAAAAGTTAATCTCCGAAGAAGATTTAGCCCCTACGCTGCTCCAGAAGCTCTTCAA |
